# Supplementary material for: DFT study of α-Keggin, lacunary Keggin, and ironII–VI substituted Keggin polyoxometalates: the effect of oxidation state and axial ligand on geometry, electronic structures and oxygen transfer
Source: Royal Society of Chemistry journal article supplement (doi:10.1039/d0ra05189f), 2020-01-01
Supplement: d0ra05189f1.pdf [file d0ra05189f1.pdf]

## DFT study of $\alpha$ -Keggin, lacunary Keggin, and iron<sup>II-VI</sup> substituted Keggin polyoxometalates: The effect of oxidation state and axial ligand in geometry, electronic structures and oxygen transfer

Soheila Mir, Bahram Yadollahi\*, Reza Omidyan, and Gholamhasan Azimi

Department of Chemistry, University of Isfahan, 81746-73441 Isfahan, Iran

This Supplementary file contains 6 Tables and 13 Figures:

**Table S1:** The relative energy differences between spin states of  $[\text{PW}_{12}\text{O}_{40}]^{3-}$  and  $[\text{PW}_{11}\text{O}_{39}]^{7-}$  obtained by OPTX-PBE/DZVP-GGA calculation.

**Table S2:** Selected bond lengths (Å) of  $[\text{PW}_{11}\text{O}_{39}(\text{Fe}^{n+})]^{(7-n)-}$  and  $[\text{PW}_{11}\text{O}_{39}(\text{Fe}^{n+}\text{OH}_2)]^{(7-n)-}$  (n=2 and 3) complexes obtained by OPTX-PBE/DZVP-GGA calculation.

**Table S3:** Optimized geometries of various POM complexes (Å) in the ground state calculated at the DFT/OPTX-PBE/DZVP-GGA level.

**Table S4:** Calculated vibrational frequencies ( $\text{cm}^{-1}$ ) and assigned bands of POM complexes.

**Table S5:** XYZ coordinates of optimized the different studied systems at the DFT/OPTX-PBE/DZVP-GGA level.

**Table S6:** Atomic spin densities (in e) and Mulliken atomic charges (in e) determined for different studied systems.

**Figure S1.** HOMOs and LUMOs of  $[\text{PW}_{12}\text{O}_{40}]^{3-}$  and  $[\text{PW}_{11}\text{O}_{39}]^{7-}$  calculated at the UOPBE/6-31G(d) level (LANL2DZ basis set on the metal atom).

**Figure S2.** The energy level expressions of FMOs for a)  $\text{Fe}^{\text{IV}}\text{OH}_2$ , b)  $\text{Fe}^{\text{IV}}\text{OH}$ , c)  $\text{Fe}^{\text{VO}}$ , d)  $\text{Fe}^{\text{VO}}$  and e)  $\text{Fe}^{\text{VO}}$  POMs in the ground state calculated at UOPBE/6-31G(d) level (LANL2DZ basis set on the metal atom).

**Figure S3:** Simulated IR ( $\text{cm}^{-1}$ ) of  $[\text{PW}_{12}\text{O}_{40}]^{3-}$  with spin state=1.

**Figure S4:** Simulated IR ( $\text{cm}^{-1}$ ) of  $[\text{PW}_{11}\text{O}_{39}]^{7-}$  with spin state=1.

**Figure S5:** Simulated IR ( $\text{cm}^{-1}$ ) of  $[\text{PW}_{11}\text{O}_{39}\text{Fe}^{+3}]^{-4}$  with spin state=2.

**Figure S6:** Simulated IR ( $\text{cm}^{-1}$ ) of  $[\text{PW}_{11}\text{O}_{39}(\text{Fe}^{+3}\text{OH}_2)]^{-4}$  with spin state=2.

**Figure S7:** Simulated IR ( $\text{cm}^{-1}$ ) of  $[\text{PW}_{11}\text{O}_{39}\text{Fe}^{+2}]^{-5}$  with spin state=1.

**Figure S8:** Simulated IR ( $\text{cm}^{-1}$ ) of  $[\text{PW}_{11}\text{O}_{39}(\text{Fe}^{+2}\text{OH}_2)]^{-5}$  with spin state=1.

**Figure S9:** Simulated IR ( $\text{cm}^{-1}$ ) of  $[\text{PW}_{11}\text{O}_{39}(\text{Fe}^{\text{IV}}\text{OH}_2)]^{3-}$  with spin state=3.

**Figure S10:** Simulated IR ( $\text{cm}^{-1}$ ) of  $[\text{PW}_{11}\text{O}_{39}(\text{Fe}^{\text{IV}}\text{OH})]^{4-}$  with spin state=3.

**Figure S11:** Simulated IR ( $\text{cm}^{-1}$ ) of  $[\text{PW}_{11}\text{O}_{39}(\text{Fe}^{\text{IV}}\text{O})]^{5-}$  with spin state=3.

**Figure S12:** Simulated IR ( $\text{cm}^{-1}$ ) of  $[\text{PW}_{11}\text{O}_{39}(\text{Fe}^{\text{VO}})]^{4-}$  with spin state=4.

**Figure S13:** Simulated IR ( $\text{cm}^{-1}$ ) of  $[\text{PW}_{11}\text{O}_{39}(\text{Fe}^{\text{VO}})]^{3-}$  with spin state=3.

**Table S1:** The relative energy differences between spin states of  $[\text{PW}_{12}\text{O}_{40}]^{3-}$  and  $[\text{PW}_{11}\text{O}_{39}]^{7-}$  obtained by OPTX-PBE/DZVP-GGA calculation.

|                                      |   |       |        |
|--------------------------------------|---|-------|--------|
| 2S+1                                 | 1 | 3     | 5      |
| $[\text{PW}_{12}\text{O}_{40}]^{3-}$ | 0 | 57.30 | 125.50 |
| $[\text{PW}_{11}\text{O}_{39}]^{7-}$ | 0 | 55.86 | -      |

**Table S2:** Selected bond lengths ( $\text{\AA}$ ) of  $[\text{PW}_{11}\text{O}_{39}(\text{Fe}^{\text{n+}})]^{(7-\text{n})-}$  and  $[\text{PW}_{11}\text{O}_{39}(\text{Fe}^{\text{n+}}\text{OH}_2)]^{(7-\text{n})-}$  (n=2 and 3) complexes obtained by OPTX-PBE/DZVP-GGA calculation.

|                                                            | $[\text{PW}_{11}\text{O}_{39}(\text{Fe}^{\text{III}})]^{4-}$ | $[\text{PW}_{11}\text{O}_{39}(\text{Fe}^{\text{III}}\text{OH}_2)]^{4-}$ | $[\text{PW}_{11}\text{O}_{39}(\text{Fe}^{\text{II}})]^{5-}$ | $[\text{PW}_{11}\text{O}_{39}(\text{Fe}^{\text{II}}\text{OH}_2)]^{5-}$ |
|------------------------------------------------------------|--------------------------------------------------------------|-------------------------------------------------------------------------|-------------------------------------------------------------|------------------------------------------------------------------------|
| Spin State                                                 | 2                                                            | 2                                                                       | 1                                                           | 1                                                                      |
| $\text{Fe}^{\text{I}}-\text{O}_{\text{aqua}}^{53}$         | -                                                            | 2.060                                                                   | -                                                           | 2.113                                                                  |
| WBI ( $\text{Fe}^{\text{I}}-\text{O}_{\text{aqua}}^{53}$ ) | -                                                            | 0.3759                                                                  | -                                                           | 0.3358                                                                 |
| $\text{Fe}^{\text{I}}-\text{O}_{\text{a}}^{48}$            | 1.907                                                        | 1.955                                                                   | 1.938                                                       | 1.982                                                                  |
| $\text{Fe}^{\text{I}}-\text{O}_{\text{c}}^{28}$            | 1.876                                                        | 1.871                                                                   | 1.932                                                       | 1.937                                                                  |
| $\text{P}^{52}-\text{O}_{\text{a}}^{48}$                   | 1.586                                                        | 1.578                                                                   | 1.582                                                       | 1.575                                                                  |
| $\text{P}^{52}-\text{O}_{\text{a}}^{50}$                   | 1.554                                                        | 1.557                                                                   | 1.559                                                       | 1.562                                                                  |
| $\text{W}^{37}-\text{O}_{\text{a}}^{48}$                   | 2.454                                                        | 2.464                                                                   | 2.461                                                       | 2.463                                                                  |
| $\text{W}^{39}-\text{O}_{\text{a}}^{48}$                   | 2.453                                                        | 2.451                                                                   | 2.460                                                       | 2.465                                                                  |
| $\text{W}^{37}-\text{O}_{\text{b}}^6$                      | 1.981                                                        | 1.993                                                                   | 1.945                                                       | 1.919                                                                  |
| $\text{W}^{39}-\text{O}_{\text{b}}^{12}$                   | 1.896                                                        | 1.880                                                                   | 1.945                                                       | 1.964                                                                  |
| $\text{W}^{37}-\text{O}_{\text{c}}^{26}$                   | 1.900                                                        | 1.887                                                                   | 1.943                                                       | 1.967                                                                  |

|                                               |       |       |       |       |
|-----------------------------------------------|-------|-------|-------|-------|
| W <sup>39</sup> -O <sub>c</sub> <sup>26</sup> | 1.971 | 1.989 | 1.942 | 1.919 |
| W <sup>37</sup> -O <sub>d</sub> <sup>34</sup> | 1.712 | 1.711 | 1.722 | 1.722 |
| W <sup>39</sup> -O <sub>d</sub> <sup>31</sup> | 1.712 | 1.712 | 1.722 | 1.720 |

**Table S3:** Optimized geometries of various POM complexes (Å) in the ground state calculated at the DFT/OPTX-PBE/DZVP-GGA level.

| POM                                 | $r$ (Fe-O <sub>ligand</sub> ) | WBI(Fe <sup>I</sup> -O <sub>ligand</sub> <sup>53</sup> ) | $r_{av}$ (Fe-O <sub>eq</sub> ) | $r$ (Fe-O <sub>a</sub> ) | $r$ (P-O <sub>a</sub> ) | Angle(O <sup>19</sup> -Fe <sup>I</sup> -O <sup>23</sup> ) | Angle(O <sup>22</sup> -Fe <sup>I</sup> -O <sup>28</sup> ) |
|-------------------------------------|-------------------------------|----------------------------------------------------------|--------------------------------|--------------------------|-------------------------|-----------------------------------------------------------|-----------------------------------------------------------|
| PWFe <sup>II</sup> OH <sub>2</sub>  | 2.113                         | 0.3358                                                   | 1.927                          | 1.982                    | 1.575                   | 176.452                                                   | 177.067                                                   |
| PWFe <sup>III</sup> OH <sub>2</sub> | 2.060                         | 0.3759                                                   | 1.893                          | 1.955                    | 1.578                   | 176.570                                                   | 175.421                                                   |
| PWFe <sup>IV</sup> OH <sub>2</sub>  | 2.047                         | 0.3844                                                   | 1.858                          | 1.920                    | 1.589                   | 177.752                                                   | 172.304                                                   |
| PWFe <sup>IV</sup> OH               | 1.815                         | 0.9089                                                   | 1.876                          | 2.043                    | 1.576                   | 173.375                                                   | 176.671                                                   |
| PWFe <sup>IV</sup> O                | 1.641                         | 1.46                                                     | 2.026                          | 2.170                    | 1.576                   | 169.40                                                    | 169.40                                                    |
| PWFe <sup>V</sup> O                 | 1.635                         | 1.3925                                                   | 1.884                          | 2.140                    | 1.573                   | 170.674                                                   | 170.581                                                   |
| PWFe <sup>VI</sup> O                | 1.601                         | 1.5416                                                   | 1.841                          | 2.239                    | 1.570                   | 168.497                                                   | 157.714                                                   |

**Table S4:** Calculated vibrational frequencies (cm<sup>-1</sup>) and assigned bands of POM complexes.

|                        | PWFe <sup>IV</sup> OH <sub>2</sub> | PWFe <sup>IV</sup> OH | PWFe <sup>IV</sup> O | PWFe <sup>V</sup> O | PWFe <sup>VI</sup> O |
|------------------------|------------------------------------|-----------------------|----------------------|---------------------|----------------------|
| 2S+1                   | 3                                  | 3                     | 3                    | 4                   | 3                    |
| V <sub>(P-Oa)</sub>    | 1102                               | 1075                  | 1054                 | 1070                | 1076                 |
| V <sub>(P-Oa)</sub>    | 1094                               | -                     | -                    | -                   | 1066                 |
| V <sub>(W=Od)</sub>    | 960                                | 943                   | 916                  | 935                 | 954                  |
| V <sub>(W-Ob-W)</sub>  | 851                                | 846                   | 842                  | 845                 | 850                  |
| V <sub>(W-Oc-W)</sub>  | 781                                | 777                   | 788                  | 781                 | 779                  |
| V <sub>(W-Oc-Fe)</sub> | 748                                | 761                   | 778                  | 754                 | 752                  |
| V <sub>(H-O-H)</sub>   | 1670                               | -                     | -                    | -                   | -                    |

|               |      |      |   |   |   |
|---------------|------|------|---|---|---|
| $V_{(H-O-H)}$ | 3643 | -    | - | - | - |
| $V_{(H-O-H)}$ | 3754 | 3735 | - | - | - |

**Table S5:** The XYZ coordinates of optimized different studied systems at the DFT/OPTX-PBE/DZVP-GGA level.

|                                                          |           |           |           |   |           |           |           |
|----------------------------------------------------------|-----------|-----------|-----------|---|-----------|-----------|-----------|
| [PW <sub>12</sub> O <sub>40</sub> ] <sup>3-</sup> 2S+1=1 |           |           |           | O | -2.986863 | 1.059724  | 1.278300  |
| P                                                        | -0.000371 | -0.000260 | 0.000049  | O | 1.509432  | -2.787458 | -1.277183 |
| W                                                        | -0.156454 | 0.006770  | -3.564432 | O | -2.145978 | -2.580486 | -2.098555 |
| W                                                        | 2.769945  | -2.243392 | 0.122269  | O | 3.776013  | 1.187387  | -0.044362 |
| W                                                        | 0.029693  | -0.153208 | 3.563948  | O | -2.217342 | -2.520494 | 2.098583  |
| W                                                        | -2.642638 | 2.389917  | -0.121397 | O | 0.586738  | 3.916165  | 0.043679  |
| W                                                        | -0.233437 | -3.002073 | -1.913340 | O | -2.008462 | -0.279004 | -3.401508 |
| W                                                        | -2.930362 | -0.694927 | 1.913279  | O | 0.035969  | -2.027393 | 3.401016  |
| W                                                        | 0.132304  | 3.089642  | 1.773345  | O | -1.598204 | 3.362285  | -1.349706 |
| W                                                        | 3.032047  | 0.607855  | -1.773323 | O | 3.570002  | -1.058569 | 1.348487  |
| W                                                        | 3.054170  | 0.815646  | 1.653309  | O | 3.562265  | -1.136044 | -1.298872 |
| W                                                        | 0.333974  | 3.144362  | -1.653833 | O | -1.673459 | 3.344199  | 1.299497  |
| W                                                        | -2.949049 | -0.906261 | -1.786687 | O | 0.047130  | -1.949885 | -3.447312 |
| W                                                        | -0.439273 | -3.054937 | 1.786860  | O | -1.934355 | -0.256486 | 3.448732  |
| O                                                        | -0.587016 | -0.685223 | -1.276940 | O | 0.006545  | 0.226616  | -5.242128 |
| O                                                        | 1.556118  | -0.144677 | 0.001086  | O | 0.222367  | 0.044009  | 5.241313  |
| O                                                        | -0.587340 | -0.685201 | 1.276811  | O | -4.095011 | 3.272799  | -0.141980 |
| O                                                        | -0.383096 | 1.515474  | -0.000724 | O | -0.205660 | -4.570276 | -2.568372 |
| O                                                        | 1.975372  | 2.253823  | -1.644233 | O | -4.483923 | -0.907276 | 2.569571  |
| O                                                        | -0.698347 | -3.346910 | -0.037486 | O | 0.394840  | 4.407023  | 2.814775  |
| O                                                        | 1.920276  | 2.300635  | 1.643341  | O | 4.293636  | 1.072436  | -2.813507 |
| O                                                        | -3.198077 | -1.208286 | 0.037949  | O | 4.316342  | 1.315342  | 2.676118  |
| O                                                        | 1.447642  | -2.802030 | 1.317220  | O | 0.630721  | 4.469088  | -2.676774 |
| O                                                        | -2.990312 | 0.995453  | -1.315468 | O | -4.504666 | -1.155904 | -2.424579 |

|   |           |          |           |   |           |           |          |
|---|-----------|----------|-----------|---|-----------|-----------|----------|
| O | 1.771644  | 0.048662 | 2.922544  | O | -0.443814 | -4.631747 | 2.421493 |
| O | -0.226527 | 1.759070 | -2.925028 | O | 3.867252  | -3.541593 | 0.144878 |
| O | -0.233032 | 1.693709 | 2.957349  |   |           |           |          |
| O | 1.709402  | 0.032551 | -2.958087 |   |           |           |          |

|                               |           |           |           |   |           |           |           |
|-------------------------------|-----------|-----------|-----------|---|-----------|-----------|-----------|
| $[PW_{11}O_{39}]^{7-} 2S+1=1$ |           |           |           | O | 1.475630  | -2.813585 | -1.296849 |
| P                             | -0.129367 | 0.147876  | -0.159346 | O | -2.151249 | -2.646005 | -2.140375 |
| W                             | -0.194683 | -0.087396 | -3.682572 | O | 3.682159  | 1.146919  | 0.198299  |
| W                             | 2.812979  | -2.366469 | 0.059554  | O | -2.151584 | -2.526340 | 2.028487  |
| W                             | 0.045979  | 0.046839  | 3.849733  | O | 0.645233  | 4.476799  | -0.498828 |
| W                             | -2.731651 | 2.598441  | -0.037049 | O | -2.051321 | -0.454916 | -3.633586 |
| W                             | -0.321453 | -3.077650 | -1.895000 | O | 0.129930  | -2.103754 | 3.245241  |
| W                             | -2.805317 | -0.756912 | 1.765147  | O | -1.739168 | 3.448919  | -1.471707 |
| W                             | 2.854628  | 0.651399  | -1.678923 | O | 3.407255  | -1.296157 | 1.356045  |
| W                             | 3.291047  | 0.876952  | 1.992241  | O | 3.505982  | -1.109463 | -1.268183 |
| W                             | 0.195399  | 3.330965  | -1.714282 | O | -2.344444 | 3.720231  | 1.222490  |
| W                             | -3.012163 | -0.829673 | -1.913887 | O | 0.094750  | -2.057270 | -3.445668 |
| W                             | -0.287450 | -3.153836 | 1.849127  | O | -1.813754 | -0.238045 | 3.383489  |
| W                             | -0.702418 | -0.634770 | -1.427979 | O | 0.069938  | 0.020194  | -5.404420 |
| O                             | 1.421570  | -0.029822 | -0.141860 | O | 0.274522  | -0.509577 | 5.489431  |
| O                             | -0.671023 | -0.550852 | 1.129704  | O | -4.352126 | 3.123789  | -0.422941 |
| O                             | -0.552611 | 1.661226  | -0.222527 | O | -0.270602 | -4.696930 | -2.532859 |
| O                             | 1.827232  | 2.287247  | -1.637342 | O | -4.358464 | -0.961543 | 2.519782  |
| O                             | -0.707852 | -3.368284 | -0.033814 | O | 4.245335  | 1.190954  | -2.575733 |
| O                             | 3.034153  | 2.533325  | 2.455082  | O | 4.787262  | 0.571955  | 2.849946  |
| O                             | -3.229869 | -1.255356 | -0.055779 | O | 0.378343  | 4.315071  | -3.145873 |
| O                             | 1.533630  | -3.194468 | 1.255324  | O | -4.583950 | -1.205685 | -2.573403 |
| O                             | -3.089557 | 0.904071  | -1.531696 | O | -0.451797 | -4.752692 | 2.522191  |
| O                             | 1.758044  | 0.161398  | 3.002534  | O | 4.007375  | -3.630884 | -0.057631 |
| O                             | -0.307126 | 1.603153  | -3.143434 | O | -2.151249 | -2.646005 | -2.140375 |

|   |           |          |           |   |          |          |          |
|---|-----------|----------|-----------|---|----------|----------|----------|
| O | -0.164044 | 1.741723 | 4.147334  | O | 3.682159 | 1.146919 | 0.198299 |
| O | 1.748889  | 0.026046 | -3.006205 |   |          |          |          |
| O | -2.973405 | 1.064724 | 1.143353  |   |          |          |          |

|                                                            |           |            |            |   |           |            |            |
|------------------------------------------------------------|-----------|------------|------------|---|-----------|------------|------------|
| [PW <sub>11</sub> O <sub>39</sub> Fe] <sup>5-</sup> 2S+1=1 |           |            |            | O | 0.862769  | -9.278594  | -19.373394 |
| Fe                                                         | 2.128889  | -9.180107  | -17.917914 | O | 5.680031  | -10.078224 | -15.873709 |
| O                                                          | 4.333534  | -14.622408 | -15.728143 | O | 1.236291  | -12.842015 | -20.392843 |
| O                                                          | 0.336119  | -12.123856 | -14.136777 | O | 5.200566  | -9.581994  | -21.252524 |
| O                                                          | 4.506166  | -12.240589 | -20.224155 | O | 3.537051  | -17.250713 | -16.437471 |
| O                                                          | 3.258594  | -14.629979 | -20.381530 | O | -0.590764 | -13.902437 | -15.877912 |
| O                                                          | -0.408607 | -11.600091 | -18.856065 | O | -0.249779 | -10.584951 | -21.535078 |
| O                                                          | 4.635985  | -15.419579 | -18.272415 | W | 0.355883  | -10.392003 | -15.216232 |
| O                                                          | 5.860208  | -13.059074 | -18.153382 | W | -0.867401 | -12.779622 | -17.433086 |
| O                                                          | 2.146306  | -10.232993 | -14.505691 | W | 0.799007  | -10.883651 | -20.202495 |
| O                                                          | -1.057351 | -11.316455 | -16.222428 | W | 0.918115  | -13.811121 | -14.681367 |
| O                                                          | 4.462513  | -11.364797 | -13.922541 | W | 4.198278  | -10.257914 | -20.026322 |
| O                                                          | 5.440152  | -10.524686 | -18.552995 | W | 4.574144  | -13.138400 | -14.491051 |
| O                                                          | 6.128663  | -12.667208 | -15.529422 | W | 4.843645  | -13.929397 | -19.520139 |
| O                                                          | 0.059430  | -14.125430 | -18.453773 | W | 3.264969  | -15.628288 | -16.940897 |
| O                                                          | 0.638177  | -15.552548 | -20.836103 | W | 6.142950  | -11.491968 | -17.070474 |
| O                                                          | 2.048151  | -15.895306 | -18.406279 | W | 3.938594  | -9.733229  | -15.031314 |
| O                                                          | -0.589056 | -9.354962  | -14.210856 | W | 1.449655  | -14.553687 | -19.694443 |
| O                                                          | 5.316281  | -13.902920 | -13.140803 | O | 6.066724  | -14.554365 | -20.556046 |
| O                                                          | 0.780549  | -9.349386  | -16.612644 | O | 7.832888  | -11.234618 | -17.241871 |
| O                                                          | 2.709533  | -13.406190 | -14.122146 | O | 2.492922  | -11.015023 | -18.422409 |
| O                                                          | 4.348762  | -8.446793  | -13.956115 | O | 2.929039  | -13.483921 | -18.082549 |
| O                                                          | 3.312516  | -8.884148  | -16.481835 | O | 1.319143  | -12.251237 | -16.516629 |
| O                                                          | 3.486490  | -8.795558  | -19.237525 | O | 3.831706  | -11.789560 | -16.386201 |
| O                                                          | 1.792238  | -15.089218 | -15.860533 | P | 2.644735  | -12.149287 | -17.330490 |
| O                                                          | -2.512633 | -13.135101 | -17.777089 |   |           |            |            |

|   |          |            |            |  |
|---|----------|------------|------------|--|
| O | 2.551493 | -10.609568 | -20.994369 |  |
| O | 0.364312 | -14.814281 | -13.398636 |  |

|                                                            |           |            |            |   |           |            |            |
|------------------------------------------------------------|-----------|------------|------------|---|-----------|------------|------------|
| [PW <sub>11</sub> O <sub>39</sub> Fe] <sup>5-</sup> 2S+1=3 |           |            |            | O | 0.881460  | -9.243988  | -19.365251 |
| Fe                                                         | 2.127690  | -9.061612  | -17.891297 | O | 5.658487  | -10.079485 | -15.870001 |
| O                                                          | 4.324594  | -14.631646 | -15.726381 | O | 1.254085  | -12.836360 | -20.395394 |
| O                                                          | 0.328288  | -12.118860 | -14.152797 | O | 5.203376  | -9.595413  | -21.236120 |
| O                                                          | 4.516941  | -12.251192 | -20.208480 | O | 3.511742  | -17.257276 | -16.442939 |
| O                                                          | 3.269877  | -14.639829 | -20.389828 | O | -0.599622 | -13.898279 | -15.886229 |
| O                                                          | -0.390669 | -11.591099 | -18.854900 | O | -0.222543 | -10.583555 | -21.509767 |
| O                                                          | 4.638703  | -15.437000 | -18.270887 | W | 0.346470  | -10.377027 | -15.235643 |
| O                                                          | 5.870285  | -13.070492 | -18.139969 | W | -0.857959 | -12.794560 | -17.434688 |
| O                                                          | 2.138187  | -10.239527 | -14.533044 | W | 0.817861  | -10.873330 | -20.169173 |
| O                                                          | -1.046039 | -11.302284 | -16.245100 | W | 0.921625  | -13.800732 | -14.679396 |
| O                                                          | 4.443082  | -11.376030 | -13.925831 | W | 4.190470  | -10.262227 | -20.012330 |
| O                                                          | 5.448620  | -10.531167 | -18.543695 | W | 4.573989  | -13.150939 | -14.501541 |
| O                                                          | 6.129081  | -12.666859 | -15.517974 | W | 4.848960  | -13.943364 | -19.512220 |
| O                                                          | 0.061055  | -14.123088 | -18.471423 | W | 3.245815  | -15.634078 | -16.950209 |
| O                                                          | 0.649503  | -15.540625 | -20.859458 | W | 6.140511  | -11.500734 | -17.072719 |
| O                                                          | 2.039808  | -15.911039 | -18.422744 | W | 3.936722  | -9.740750  | -15.022612 |
| O                                                          | -0.604817 | -9.375017  | -14.201015 | W | 1.462281  | -14.552194 | -19.710038 |
| O                                                          | 5.311069  | -13.912581 | -13.147167 | O | 6.076583  | -14.565265 | -20.544352 |
| O                                                          | 0.759556  | -9.274374  | -16.592595 | O | 7.830646  | -11.233195 | -17.228273 |
| O                                                          | 2.701115  | -13.413533 | -14.120409 | O | 2.520924  | -11.075892 | -18.458794 |
| O                                                          | 4.344879  | -8.498529  | -13.901952 | O | 2.936851  | -13.541398 | -18.064801 |
| O                                                          | 3.309938  | -8.806241  | -16.440505 | O | 1.322197  | -12.260787 | -16.537808 |
| O                                                          | 3.510450  | -8.780631  | -19.219945 | O | 3.830275  | -11.804541 | -16.400277 |
| O                                                          | 1.779870  | -15.090363 | -15.867467 | P | 2.650801  | -12.177611 | -17.356206 |
| O                                                          | -2.504995 | -13.135586 | -17.786296 |   |           |            |            |
| O                                                          | 2.562683  | -10.592522 | -20.993626 |   |           |            |            |

|   |          |            |            |  |  |  |  |
|---|----------|------------|------------|--|--|--|--|
| O | 0.356509 | -14.801042 | -13.399192 |  |  |  |  |
|---|----------|------------|------------|--|--|--|--|

|                                                            |           |            |            |   |           |            |            |
|------------------------------------------------------------|-----------|------------|------------|---|-----------|------------|------------|
| [PW <sub>11</sub> O <sub>39</sub> Fe] <sup>5-</sup> 2S+1=5 |           |            |            | O | 0.810410  | -9.262409  | -19.468483 |
| Fe                                                         | 2.068076  | -9.085325  | -17.805186 | O | 5.673919  | -10.071459 | -15.863695 |
| O                                                          | 4.336492  | -14.620543 | -15.714247 | O | 1.283969  | -12.860490 | -20.395193 |
| O                                                          | 0.345975  | -12.138209 | -14.157482 | O | 5.281743  | -9.639022  | -21.252710 |
| O                                                          | 4.534462  | -12.263329 | -20.222856 | O | 3.556633  | -17.246793 | -16.438829 |
| O                                                          | 3.263908  | -14.673062 | -20.392926 | O | -0.603442 | -13.873393 | -15.913906 |
| O                                                          | -0.362164 | -11.580049 | -18.878248 | O | -0.158660 | -10.677311 | -21.622180 |
| O                                                          | 4.656524  | -15.428289 | -18.265768 | W | 0.373406  | -10.343889 | -15.131047 |
| O                                                          | 5.872267  | -13.079683 | -18.153907 | W | -0.849851 | -12.701160 | -17.439723 |
| O                                                          | 2.145595  | -10.151571 | -14.539342 | W | 0.863820  | -10.875759 | -20.248713 |
| O                                                          | -1.026232 | -11.267811 | -16.218358 | W | 0.895461  | -13.828435 | -14.718272 |
| O                                                          | 4.428409  | -11.370990 | -13.914706 | W | 4.235898  | -10.215383 | -20.008270 |
| O                                                          | 5.436643  | -10.527213 | -18.525454 | W | 4.528999  | -13.154736 | -14.468771 |
| O                                                          | 6.110362  | -12.653974 | -15.498589 | W | 4.813044  | -13.952831 | -19.578247 |
| O                                                          | 0.051449  | -14.108439 | -18.460179 | W | 3.289012  | -15.628707 | -16.959603 |
| O                                                          | 0.606566  | -15.559778 | -20.809082 | W | 6.134643  | -11.574743 | -17.079320 |
| O                                                          | 2.054914  | -15.911587 | -18.403264 | W | 4.022463  | -9.715840  | -15.003887 |
| O                                                          | -0.566358 | -9.451276  | -13.995285 | W | 1.420657  | -14.559384 | -19.670629 |
| O                                                          | 5.274714  | -13.909226 | -13.115425 | O | 6.049815  | -14.580702 | -20.596655 |
| O                                                          | 0.585405  | -9.154933  | -16.472431 | O | 7.824223  | -11.298853 | -17.226237 |
| O                                                          | 2.689184  | -13.423876 | -14.104129 | O | 2.537364  | -11.034221 | -18.473362 |
| O                                                          | 4.449864  | -8.519367  | -13.840564 | O | 2.940368  | -13.517193 | -18.085072 |
| O                                                          | 3.367024  | -8.723013  | -16.364292 | O | 1.330997  | -12.222652 | -16.556516 |
| O                                                          | 3.585735  | -8.715236  | -19.308451 | O | 3.837009  | -11.794112 | -16.408202 |
| O                                                          | 1.798101  | -15.076614 | -15.878974 | P | 2.660099  | -12.151548 | -17.374107 |
| O                                                          | -2.499725 | -13.031362 | -17.788891 |   |           |            |            |
| O                                                          | 2.600740  | -10.566528 | -21.011021 |   |           |            |            |
| O                                                          | 0.319939  | -14.843074 | -13.454686 |   |           |            |            |



|                                                            |           |            |            |   |           |            |            |
|------------------------------------------------------------|-----------|------------|------------|---|-----------|------------|------------|
| [PW <sub>11</sub> O <sub>39</sub> Fe] <sup>4-</sup> 2S+1=2 |           |            |            | O | 0.742854  | -9.3606494 | -19.330302 |
| Fe                                                         | 1.983081  | -9.238086  | -17.928850 | O | 5.584896  | -9.984633  | -15.923852 |
| O                                                          | 4.380736  | -14.555103 | -15.729148 | O | 1.207583  | -12.877524 | -20.368776 |
| O                                                          | 0.315195  | -12.179414 | -14.143939 | O | 5.089216  | -9.492147  | -21.205449 |
| O                                                          | 4.438425  | -12.161004 | -20.241958 | O | 3.689235  | -17.190419 | -16.436810 |
| O                                                          | 3.252673  | -14.599875 | -20.387822 | O | -0.596389 | -13.971745 | -15.880423 |
| O                                                          | -0.472676 | -11.676005 | -18.850399 | O | -0.288436 | -10.701711 | -21.547162 |
| O                                                          | 4.690451  | -15.345994 | -18.296611 | W | 0.297785  | -10.490232 | -15.187265 |
| O                                                          | 5.816982  | -12.951860 | -18.191002 | W | -0.915764 | -12.825767 | -17.442985 |
| O                                                          | 2.072389  | -10.197218 | -14.555566 | W | 0.768313  | -10.983025 | -20.230544 |
| O                                                          | -1.122334 | -11.401530 | -16.211170 | W | 0.902274  | -13.880177 | -14.724136 |
| O                                                          | 4.413945  | -11.272611 | -13.940655 | W | 4.130601  | -10.227636 | -19.993095 |
| O                                                          | 5.344576  | -10.430179 | -18.550964 | W | 4.523674  | -13.066888 | -14.474406 |
| O                                                          | 6.097034  | -12.554413 | -15.529590 | W | 4.805004  | -13.869811 | -19.566568 |
| O                                                          | 0.050586  | -14.185465 | -18.438186 | W | 3.365269  | -15.588535 | -16.939217 |
| O                                                          | 0.654195  | -15.621840 | -20.777089 | W | 6.095794  | -11.449531 | -17.071757 |
| O                                                          | 2.118765  | -15.907706 | -18.395543 | W | 3.873751  | -9.706190  | -15.069462 |
| O                                                          | -0.659083 | -9.479096  | -14.186902 | W | 1.439943  | -14.613565 | -19.641717 |
| O                                                          | 5.283659  | -13.792458 | -13.125448 | O | 6.033170  | -14.440447 | -20.610167 |
| O                                                          | 0.664121  | -9.423391  | -16.627896 | O | 7.767988  | -11.151569 | -17.258674 |
| O                                                          | 2.701557  | -13.381989 | -14.136036 | O | 2.425167  | -11.026354 | -18.421294 |
| O                                                          | 4.244332  | -8.399103  | -14.023913 | O | 2.919445  | -13.471465 | -18.083994 |
| O                                                          | 3.170621  | -8.874478  | -16.529416 | O | 1.278065  | -12.285174 | -16.519266 |
| O                                                          | 3.293460  | -8.786358  | -19.208251 | O | 3.778061  | -11.760801 | -16.385174 |
| O                                                          | 1.852430  | -15.098091 | -15.868233 | P | 2.602260  | -12.155762 | -17.321724 |
| O                                                          | -2.543810 | -13.222309 | -17.779743 |   |           |            |            |
| O                                                          | 2.461411  | -10.566060 | -20.985096 |   |           |            |            |
| O                                                          | 0.391780  | -14.890082 | -13.442480 |   |           |            |            |

|                                                            |           |            |            |   |           |            |            |
|------------------------------------------------------------|-----------|------------|------------|---|-----------|------------|------------|
| [PW <sub>11</sub> O <sub>39</sub> Fe] <sup>4+</sup> 2S+1=4 |           |            |            | O | 0.905100  | -9.249728  | -19.336226 |
| Fe                                                         | 2.127565  | -9.100721  | -17.878301 | O | 5.677037  | -10.072587 | -15.880126 |
| O                                                          | 4.325633  | -14.619869 | -15.723727 | O | 1.245397  | -12.813326 | -20.376043 |
| O                                                          | 0.338395  | -12.092725 | -14.156309 | O | 5.210409  | -9.589928  | -21.187860 |
| O                                                          | 4.514178  | -12.221819 | -20.204498 | O | 3.528791  | -17.235012 | -16.447409 |
| O                                                          | 3.253504  | -14.613765 | -20.385193 | O | -0.611370 | -13.858167 | -15.884702 |
| O                                                          | -0.391449 | -11.564851 | -18.845149 | O | -0.194031 | -10.574152 | -21.504490 |
| O                                                          | 4.638786  | -15.426626 | -18.280457 | W | 0.367504  | -10.418389 | -15.210076 |
| O                                                          | 5.862199  | -13.062123 | -18.150730 | W | -0.869668 | -12.752095 | -17.451393 |
| O                                                          | 2.156096  | -10.200524 | -14.571134 | W | 0.846739  | -10.884800 | -20.182068 |
| O                                                          | -1.041629 | -11.272227 | -16.239073 | W | 0.909709  | -13.811675 | -14.713612 |
| O                                                          | 4.452094  | -11.345729 | -13.928618 | W | 4.207449  | -10.272455 | -19.980974 |
| O                                                          | 5.439943  | -10.520453 | -18.517909 | W | 4.548707  | -13.146094 | -14.494364 |
| O                                                          | 6.122042  | -12.653434 | -15.508980 | W | 4.830836  | -13.938047 | -19.525459 |
| O                                                          | 0.050053  | -14.099557 | -18.458926 | W | 3.266092  | -15.622553 | -16.954896 |
| O                                                          | 0.633353  | -15.522673 | -20.827889 | W | 6.154393  | -11.529609 | -17.065842 |
| O                                                          | 2.038688  | -15.894478 | -18.415320 | W | 3.977328  | -9.765512  | -15.030922 |
| O                                                          | -0.539712 | -9.381357  | -14.193915 | W | 1.446748  | -14.548078 | -19.682857 |
| O                                                          | 5.274012  | -13.896373 | -13.140077 | O | 6.047237  | -14.547140 | -20.560825 |
| O                                                          | 0.776371  | -9.306294  | -16.632147 | O | 7.835015  | -11.268300 | -17.234204 |
| O                                                          | 2.693171  | -13.382138 | -14.137015 | O | 2.518513  | -11.068487 | -18.440226 |
| O                                                          | 4.356193  | -8.494669  | -13.947984 | O | 2.937569  | -13.527043 | -18.059391 |
| O                                                          | 3.333325  | -8.842051  | -16.495571 | O | 1.324890  | -12.251592 | -16.530749 |
| O                                                          | 3.475935  | -8.778940  | -19.190880 | O | 3.835493  | -11.803052 | -16.390754 |
| O                                                          | 1.781870  | -15.078085 | -15.867417 | P | 2.655622  | -12.176212 | -17.337714 |
| O                                                          | -2.509461 | -13.084398 | -17.800385 |   |           |            |            |
| O                                                          | 2.572106  | -10.564996 | -20.975454 |   |           |            |            |
| O                                                          | 0.351665  | -14.795185 | -13.431330 |   |           |            |            |

|                                                            |  |  |  |   |          |           |            |
|------------------------------------------------------------|--|--|--|---|----------|-----------|------------|
| [PW <sub>11</sub> O <sub>39</sub> Fe] <sup>4+</sup> 2S+1=6 |  |  |  | O | 0.837855 | -9.220462 | -19.409950 |
|------------------------------------------------------------|--|--|--|---|----------|-----------|------------|

|    |           |            |            |   |           |            |            |
|----|-----------|------------|------------|---|-----------|------------|------------|
| Fe | 2.175337  | -9.100345  | -17.883127 | O | 5.655743  | -10.050047 | -15.860284 |
| O  | 4.322330  | -14.628624 | -15.732871 | O | 1.235658  | -12.828267 | -20.402121 |
| O  | 0.332566  | -12.085784 | -14.135686 | O | 5.160622  | -9.717297  | -21.334981 |
| O  | 4.487515  | -12.257122 | -20.193283 | O | 3.456719  | -17.257651 | -16.452645 |
| O  | 3.286375  | -14.638923 | -20.378184 | O | -0.579760 | -13.878877 | -15.849292 |
| O  | -0.388179 | -11.582687 | -18.823635 | O | -0.292353 | -10.624157 | -21.498132 |
| O  | 4.627569  | -15.427869 | -18.245697 | W | 0.283078  | -10.416625 | -15.237296 |
| O  | 5.872232  | -13.030074 | -18.129030 | W | -0.832953 | -12.867315 | -17.426664 |
| O  | 2.105373  | -10.164072 | -14.564726 | W | 0.750695  | -10.867789 | -20.161581 |
| O  | -1.055832 | -11.307143 | -16.246497 | W | 0.974426  | -13.776851 | -14.639615 |
| O  | 4.451546  | -11.376963 | -13.933530 | W | 4.160056  | -10.308734 | -20.077802 |
| O  | 5.413077  | -10.504775 | -18.561662 | W | 4.631823  | -13.187052 | -14.556952 |
| O  | 6.150223  | -12.624472 | -15.537937 | W | 4.881973  | -13.937087 | -19.452641 |
| O  | 0.078515  | -14.122997 | -18.473466 | W | 3.195893  | -15.647694 | -16.968178 |
| O  | 0.689306  | -15.516952 | -20.900327 | W | 6.129626  | -11.411113 | -17.083934 |
| O  | 2.025643  | -15.903669 | -18.423452 | W | 3.919015  | -9.798040  | -14.940142 |
| O  | -0.644776 | -9.400388  | -14.217887 | W | 1.502007  | -14.532654 | -19.762065 |
| O  | 5.372760  | -13.941140 | -13.213094 | O | 6.106341  | -14.551967 | -20.475645 |
| O  | 0.727296  | -9.299170  | -16.619697 | O | 7.806558  | -11.132266 | -17.259902 |
| O  | 2.729925  | -13.381278 | -14.116934 | O | 2.490033  | -11.037718 | -18.414446 |
| O  | 4.308900  | -8.553178  | -13.830674 | O | 2.928121  | -13.510929 | -18.073549 |
| O  | 3.379968  | -8.851251  | -16.451010 | O | 1.327460  | -12.259684 | -16.510867 |
| O  | 3.529771  | -8.775139  | -19.299500 | O | 3.835428  | -11.799338 | -16.393714 |
| O  | 1.782008  | -15.073804 | -15.845050 | P | 2.649136  | -12.172367 | -17.330981 |
| O  | -2.470525 | -13.211088 | -17.773166 |   |           |            |            |
| O  | 2.509388  | -10.585574 | -20.981507 |   |           |            |            |
| O  | 0.417800  | -14.758739 | -13.355023 |   |           |            |            |

|                                                                              |          |           |            |   |          |           |            |
|------------------------------------------------------------------------------|----------|-----------|------------|---|----------|-----------|------------|
| [PW <sub>11</sub> O <sub>39</sub> Fe(H <sub>2</sub> O)] <sup>4-</sup> 2S+1=2 |          |           |            | O | 0.720851 | -9.360558 | -19.359398 |
| Fe                                                                           | 1.958644 | -9.171471 | -17.968496 | O | 5.592995 | -9.992501 | -15.924777 |

|   |           |            |            |   |           |            |            |
|---|-----------|------------|------------|---|-----------|------------|------------|
| O | 4.384457  | -14.56186  | -15.716219 | O | 1.211482  | -12.885189 | -20.361207 |
| O | 0.319126  | -12.199088 | -14.146406 | O | 5.11199   | -9.472158  | -21.188872 |
| O | 4.437487  | -12.15122  | -20.256651 | O | 3.72936   | -17.187656 | -16.438456 |
| O | 3.236167  | -14.601716 | -20.38762  | O | -0.608242 | -13.972291 | -15.893404 |
| O | -0.465836 | -11.663124 | -18.846316 | O | -0.263391 | -10.744517 | -21.563399 |
| O | 4.692434  | -15.347279 | -18.307508 | W | 0.315921  | -10.512234 | -15.156399 |
| O | 5.796885  | -12.954953 | -18.194572 | W | -0.930023 | -12.795529 | -17.441493 |
| O | 2.080249  | -10.192338 | -14.547605 | W | 0.794455  | -11.01091  | -20.245114 |
| O | -1.13202  | -11.400584 | -16.194589 | W | 0.897002  | -13.910764 | -14.753653 |
| O | 4.414726  | -11.265789 | -13.931823 | W | 4.1455    | -10.200453 | -19.977832 |
| O | 5.342605  | -10.426033 | -18.545847 | W | 4.504896  | -13.04981  | -14.450627 |
| O | 6.091264  | -12.568485 | -15.519948 | W | 4.780633  | -13.854579 | -19.592399 |
| O | 0.033938  | -14.17825  | -18.43599  | W | 3.405818  | -15.584137 | -16.937217 |
| O | 0.636956  | -15.644103 | -20.742211 | W | 6.090396  | -11.477083 | -17.060815 |
| O | 2.11871   | -15.915708 | -18.385673 | W | 3.883273  | -9.686603  | -15.092076 |
| O | -0.63749  | -9.500224  | -14.150114 | W | 1.4251    | -14.637018 | -19.607107 |
| O | 5.261388  | -13.775769 | -13.099225 | O | 6.008104  | -14.429554 | -20.635145 |
| O | 0.642324  | -9.453867  | -16.619463 | O | 7.763905  | -11.188675 | -17.251508 |
| O | 2.692642  | -13.390359 | -14.135828 | O | 2.442566  | -11.012988 | -18.413346 |
| O | 4.259501  | -8.378551  | -14.046782 | O | 2.919374  | -13.473371 | -18.080346 |
| O | 3.172101  | -8.878106  | -16.53297  | O | 1.277463  | -12.286086 | -16.523387 |
| O | 3.288338  | -8.753805  | -19.247978 | O | 3.777068  | -11.766788 | -16.376232 |
| O | 1.855752  | -15.107306 | -15.879599 | P | 2.603702  | -12.147285 | -17.327839 |
| O | -2.560369 | -13.179652 | -17.786037 | O | 1.181195  | -7.266735  | -17.848837 |
| O | 2.470452  | -10.563938 | -20.986976 | H | 0.660302  | -7.562713  | -17.066949 |
| O | 0.381373  | -14.925708 | -13.477955 | H | 0.594786  | -7.489237  | -18.604812 |

|                                                                              |          |            |            |   |          |            |            |
|------------------------------------------------------------------------------|----------|------------|------------|---|----------|------------|------------|
| [PW <sub>11</sub> O <sub>39</sub> Fe(H <sub>2</sub> O)] <sup>4-</sup> 2S+1=4 |          |            |            | O | 0.897027 | -9.274507  | -19.343887 |
| Fe                                                                           | 2.099627 | -9.104334  | -17.873772 | O | 5.679642 | -10.069416 | -15.890055 |
| O                                                                            | 4.338153 | -14.614936 | -15.709079 | O | 1.259856 | -12.826648 | -20.366674 |

|   |           |            |            |   |           |            |            |
|---|-----------|------------|------------|---|-----------|------------|------------|
| O | 0.339392  | -12.112043 | -14.165151 | O | 5.23047   | -9.545627  | -21.153984 |
| O | 4.522185  | -12.206088 | -20.216882 | O | 3.586343  | -17.223974 | -16.445844 |
| O | 3.241287  | -14.616455 | -20.385704 | O | -0.624421 | -13.861234 | -15.902401 |
| O | -0.393971 | -11.567306 | -18.857731 | O | -0.151306 | -10.618251 | -21.534341 |
| O | 4.65225   | -15.418332 | -18.291084 | W | 0.392945  | -10.429525 | -15.171757 |
| O | 5.850655  | -13.066474 | -18.160423 | W | -0.890281 | -12.704739 | -17.451942 |
| O | 2.157937  | -10.180448 | -14.567724 | W | 0.880975  | -10.920888 | -20.20551  |
| O | -1.048397 | -11.267101 | -16.230429 | W | 0.890445  | -13.842657 | -14.751918 |
| O | 4.442646  | -11.321589 | -13.921602 | W | 4.222099  | -10.239783 | -19.958965 |
| O | 5.435032  | -10.515886 | -18.506148 | W | 4.517605  | -13.126248 | -14.468896 |
| O | 6.10659   | -12.648595 | -15.494792 | W | 4.80332   | -13.925243 | -19.571474 |
| O | 0.037182  | -14.096661 | -18.451946 | W | 3.319483  | -15.613304 | -16.954579 |
| O | 0.608735  | -15.549353 | -20.781651 | W | 6.150998  | -11.56976  | -17.067656 |
| O | 2.052372  | -15.902302 | -18.403072 | W | 4.006645  | -9.750504  | -15.050631 |
| O | -0.521746 | -9.401997  | -14.153699 | W | 1.419165  | -14.573709 | -19.636539 |
| O | 5.239599  | -13.867085 | -13.108506 | O | 6.019729  | -14.533404 | -20.606616 |
| O | 0.739592  | -9.313275  | -16.626416 | O | 7.831866  | -11.312648 | -17.233432 |
| O | 2.681213  | -13.379993 | -14.141035 | O | 2.5255    | -11.068237 | -18.442896 |
| O | 4.387126  | -8.47117   | -13.980734 | O | 2.939995  | -13.527113 | -18.057267 |
| O | 3.307859  | -8.847642  | -16.501468 | O | 1.32068   | -12.249013 | -16.536283 |
| O | 3.459225  | -8.763158  | -19.184774 | O | 3.830625  | -11.801565 | -16.386275 |
| O | 1.796383  | -15.07879  | -15.880644 | P | 2.654002  | -12.174521 | -17.338898 |
| O | -2.528038 | -13.038576 | -17.803827 | O | -1.383049 | -7.436054  | -18.202896 |
| O | 2.593598  | -10.556419 | -20.976361 | H | -1.095124 | -7.907837  | -17.397641 |
| O | 0.335568  | -14.832238 | -13.473868 | H | -0.870049 | -7.940814  | -18.86573  |

|                                                                          |          |            |            |   |          |            |            |
|--------------------------------------------------------------------------|----------|------------|------------|---|----------|------------|------------|
| $[\text{PW}_{11}\text{O}_{39}\text{Fe}(\text{H}_2\text{O})]^{4-}$ 2S+1=6 |          |            |            | O | 0.837189 | -9.221409  | -19.414645 |
| Fe                                                                       | 2.175812 | -9.094984  | -17.880712 | O | 5.655898 | -10.051481 | -15.86013  |
| O                                                                        | 4.320824 | -14.627694 | -15.730062 | O | 1.237714 | -12.830657 | -20.401759 |
| O                                                                        | 0.332022 | -12.086459 | -14.136821 | O | 5.164582 | -9.709634  | -21.33146  |

|   |           |            |            |   |           |            |            |
|---|-----------|------------|------------|---|-----------|------------|------------|
| O | 4.48844   | -12.254323 | -20.196174 | O | 3.463093  | -17.254066 | -16.45242  |
| O | 3.283109  | -14.639765 | -20.377329 | O | -0.584199 | -13.876285 | -15.850285 |
| O | -0.385464 | -11.581332 | -18.825022 | O | -0.283705 | -10.639183 | -21.501087 |
| O | 4.62615   | -15.426303 | -18.247359 | W | 0.286667  | -10.42214  | -15.229349 |
| O | 5.867731  | -13.031768 | -18.129161 | W | -0.836501 | -12.863302 | -17.42602  |
| O | 2.105385  | -10.1609   | -14.569388 | W | 0.757636  | -10.880782 | -20.165147 |
| O | -1.052103 | -11.30397  | -16.248233 | W | 0.973977  | -13.781853 | -14.645697 |
| O | 4.44974   | -11.374441 | -13.931089 | W | 4.163203  | -10.300228 | -20.075649 |
| O | 5.410868  | -10.505505 | -18.560841 | W | 4.628042  | -13.184702 | -14.552509 |
| O | 6.146716  | -12.625278 | -15.535081 | W | 4.877204  | -13.932257 | -19.460339 |
| O | 0.075527  | -14.120459 | -18.47315  | W | 3.203804  | -15.644964 | -16.969026 |
| O | 0.685499  | -15.521514 | -20.892468 | W | 6.127033  | -11.417273 | -17.084349 |
| O | 2.024082  | -15.903286 | -18.420771 | W | 3.924227  | -9.797098  | -14.942254 |
| O | -0.643128 | -9.406042  | -14.21369  | W | 1.498937  | -14.538697 | -19.754744 |
| O | 5.367246  | -13.939142 | -13.208761 | O | 6.10157   | -14.547883 | -20.481846 |
| O | 0.718885  | -9.288132  | -16.616697 | O | 7.803495  | -11.140166 | -17.26033  |
| O | 2.727124  | -13.379786 | -14.117197 | O | 2.487083  | -11.033545 | -18.413127 |
| O | 4.312592  | -8.5518    | -13.834478 | O | 2.926763  | -13.507658 | -18.074735 |
| O | 3.381044  | -8.854262  | -16.45458  | O | 1.327358  | -12.257973 | -16.510076 |
| O | 3.529007  | -8.770364  | -19.300191 | O | 3.834933  | -11.797472 | -16.394339 |
| O | 1.781083  | -15.07115  | -15.84854  | P | 2.648115  | -12.169489 | -17.331337 |
| O | -2.473205 | -13.204742 | -17.774137 | O | -1.065202 | -7.083098  | -18.127777 |
| O | 2.513042  | -10.584971 | -20.979799 | H | -0.835291 | -7.591728  | -17.326054 |
| O | 0.416627  | -14.762917 | -13.361867 | H | -0.668177 | -7.668661  | -18.804551 |

|                                                                              |          |            |            |   |          |            |            |
|------------------------------------------------------------------------------|----------|------------|------------|---|----------|------------|------------|
| [PW <sub>11</sub> O <sub>39</sub> Fe(H <sub>2</sub> O)] <sup>5-</sup> 2S+1=1 |          |            |            | O | 0.848794 | -9.286266  | -19.379689 |
| Fe                                                                           | 2.120203 | -9.178909  | -17.918849 | O | 5.680776 | -10.07777  | -15.880098 |
| O                                                                            | 4.339562 | -14.62125  | -15.722289 | O | 1.238802 | -12.848482 | -20.383563 |
| O                                                                            | 0.342246 | -12.133826 | -14.13822  | O | 5.212928 | -9.55974   | -21.235439 |
| O                                                                            | 4.503781 | -12.229157 | -20.233966 | O | 3.565101 | -17.243828 | -16.436755 |

|   |           |            |            |   |           |            |            |
|---|-----------|------------|------------|---|-----------|------------|------------|
| O | 3.249729  | -14.628248 | -20.38241  | O | -0.598327 | -13.902275 | -15.883467 |
| O | -0.405711 | -11.599676 | -18.856381 | O | -0.224368 | -10.618758 | -21.551489 |
| O | 4.639527  | -15.415367 | -18.280441 | W | 0.370648  | -10.404707 | -15.195298 |
| O | 5.846535  | -13.05769  | -18.160916 | W | -0.876622 | -12.757061 | -17.436697 |
| O | 2.151761  | -10.226193 | -14.505539 | W | 0.822646  | -10.90261  | -20.21737  |
| O | -1.05726  | -11.315971 | -16.213553 | W | 0.907251  | -13.82873  | -14.70207  |
| O | 4.46285   | -11.352204 | -13.919803 | W | 4.212511  | -10.241884 | -20.01266  |
| O | 5.438444  | -10.519248 | -18.549842 | W | 4.556581  | -13.127029 | -14.475111 |
| O | 6.11926   | -12.668541 | -15.524973 | W | 4.826383  | -13.921457 | -19.543112 |
| O | 0.049037  | -14.126058 | -18.448569 | W | 3.292377  | -15.622129 | -16.939521 |
| O | 0.62426   | -15.565681 | -20.812219 | W | 6.139276  | -11.51218  | -17.067318 |
| O | 2.052706  | -15.896866 | -18.400832 | W | 3.952358  | -9.722164  | -15.043384 |
| O | -0.578307 | -9.37082   | -14.193102 | W | 1.43484   | -14.568104 | -19.670225 |
| O | 5.298535  | -13.888089 | -13.123741 | O | 6.049594  | -14.544456 | -20.578799 |
| O | 0.768242  | -9.352748  | -16.604764 | O | 7.828852  | -11.259749 | -17.239946 |
| O | 2.70596   | -13.406267 | -14.124926 | O | 2.490259  | -11.012783 | -18.422962 |
| O | 4.36172   | -8.432426  | -13.974152 | O | 2.927646  | -13.482208 | -18.081883 |
| O | 3.305391  | -8.882541  | -16.488119 | O | 1.316611  | -12.250601 | -16.517556 |
| O | 3.473299  | -8.78852   | -19.236679 | O | 3.827979  | -11.786319 | -16.385576 |
| O | 1.798098  | -15.08857  | -15.868415 | P | 2.642208  | -12.147064 | -17.331048 |
| O | -2.521214 | -13.109724 | -17.781293 | O | -1.127188 | -7.262386  | -18.087491 |
| O | 2.557649  | -10.603455 | -20.994412 | H | -0.878937 | -7.742095  | -17.272258 |
| O | 0.356929  | -14.833989 | -13.420724 | H | -0.657557 | -7.831952  | -18.734483 |

|                                                                              |          |            |            |   |           |            |            |
|------------------------------------------------------------------------------|----------|------------|------------|---|-----------|------------|------------|
| [PW <sub>11</sub> O <sub>39</sub> Fe(H <sub>2</sub> O)] <sup>5-</sup> 2S+1=3 |          |            |            | O | 0.87343   | -9.254927  | -19.371703 |
| Fe                                                                           | 2.120339 | -9.062104  | -17.889674 | O | 5.65991   | -10.080959 | -15.872376 |
| O                                                                            | 4.329197 | -14.633246 | -15.718254 | O | 1.262191  | -12.841173 | -20.386835 |
| O                                                                            | 0.331942 | -12.126607 | -14.159354 | O | 5.212865  | -9.572052  | -21.220032 |
| O                                                                            | 4.520316 | -12.240667 | -20.217756 | O | 3.537288  | -17.25115  | -16.442183 |
| O                                                                            | 3.262978 | -14.638421 | -20.390765 | O | -0.607726 | -13.896562 | -15.895199 |

|   |           |            |            |   |           |            |            |
|---|-----------|------------|------------|---|-----------|------------|------------|
| O | -0.390042 | -11.591414 | -18.8585   | O | -0.199762 | -10.615637 | -21.524092 |
| O | 4.641836  | -15.434408 | -18.277914 | W | 0.359905  | -10.38662  | -15.216399 |
| O | 5.856952  | -13.072293 | -18.14441  | W | -0.869239 | -12.773282 | -17.436226 |
| O | 2.141156  | -10.230298 | -14.533344 | W | 0.836565  | -10.897298 | -20.181306 |
| O | -1.045852 | -11.298472 | -16.241446 | W | 0.914482  | -13.816065 | -14.701204 |
| O | 4.440604  | -11.364987 | -13.91937  | W | 4.199284  | -10.244524 | -20.001439 |
| O | 5.444515  | -10.527852 | -18.538419 | W | 4.559807  | -13.139473 | -14.485697 |
| O | 6.118487  | -12.669439 | -15.511511 | W | 4.8329    | -13.93566  | -19.536529 |
| O | 0.050349  | -14.121441 | -18.470203 | W | 3.274712  | -15.627953 | -16.948565 |
| O | 0.636836  | -15.552443 | -20.836866 | W | 6.13522   | -11.520205 | -17.07283  |
| O | 2.043686  | -15.912149 | -18.418709 | W | 3.951581  | -9.731042  | -15.031565 |
| O | -0.596299 | -9.391044  | -14.183711 | W | 1.448182  | -14.567397 | -19.685037 |
| O | 5.293984  | -13.898685 | -13.129331 | O | 6.06205   | -14.556751 | -20.566179 |
| O | 0.743742  | -9.270717  | -16.587091 | O | 7.825292  | -11.257973 | -17.228208 |
| O | 2.696565  | -13.413046 | -14.125048 | O | 2.522013  | -11.073735 | -18.458485 |
| O | 4.360057  | -8.485382  | -13.91692  | O | 2.937271  | -13.53975  | -18.063915 |
| O | 3.304291  | -8.807098  | -16.4447   | O | 1.320267  | -12.258574 | -16.540234 |
| O | 3.501671  | -8.770114  | -19.215234 | O | 3.827462  | -11.802631 | -16.397564 |
| O | 1.783785  | -15.087757 | -15.878503 | P | 2.650093  | -12.175775 | -17.356167 |
| O | -2.515194 | -13.111853 | -17.789297 | O | -1.19444  | -7.267992  | -18.144486 |
| O | 2.571819  | -10.586214 | -20.991903 | H | -0.895767 | -7.725231  | -17.332611 |
| O | 0.350365  | -14.817816 | -13.42299  | H | -0.736528 | -7.835413  | -18.800626 |

|                                                                          |           |            |            |   |           |            |            |
|--------------------------------------------------------------------------|-----------|------------|------------|---|-----------|------------|------------|
| $[\text{PW}_{11}\text{O}_{39}\text{Fe}(\text{H}_2\text{O})]^{5-}$ 2S+1=5 |           |            |            | O | 0.804363  | -9.285271  | -19.467328 |
| Fe                                                                       | 2.041446  | -9.090695  | -17.80448  | O | 5.680668  | -10.070709 | -15.871974 |
| O                                                                        | 4.344031  | -14.619605 | -15.70827  | O | 1.291901  | -12.861835 | -20.376584 |
| O                                                                        | 0.351381  | -12.146002 | -14.163154 | O | 5.300143  | -9.612089  | -21.231032 |
| O                                                                        | 4.536166  | -12.251901 | -20.236296 | O | 3.591101  | -17.237694 | -16.439096 |
| O                                                                        | 3.25198   | -14.669315 | -20.395633 | O | -0.615754 | -13.872989 | -15.922172 |
| O                                                                        | -0.369872 | -11.577462 | -18.880057 | O | -0.122854 | -10.711628 | -21.639382 |



|   |           |            |            |   |           |            |            |
|---|-----------|------------|------------|---|-----------|------------|------------|
| O | 4.660935  | -15.425793 | -18.278825 | W | 0.387928  | -10.361237 | -15.100859 |
| O | 5.861914  | -13.081476 | -18.165066 | W | -0.869087 | -12.667713 | -17.443529 |
| O | 2.15357   | -10.137613 | -14.535341 | W | 0.894236  | -10.906184 | -20.264553 |
| O | -1.038302 | -11.266162 | -16.207035 | W | 0.879354  | -13.848516 | -14.748989 |
| O | 4.431029  | -11.354664 | -13.910462 | W | 4.251391  | -10.193709 | -19.992516 |
| O | 5.437496  | -10.523425 | -18.520452 | W | 4.508025  | -13.138348 | -14.451218 |
| O | 6.100778  | -12.6562   | -15.495343 | W | 4.796764  | -13.943457 | -19.608215 |
| O | 0.036996  | -14.105207 | -18.453727 | W | 3.324699  | -15.619486 | -16.957453 |
| O | 0.590271  | -15.571269 | -20.778004 | W | 6.134146  | -11.597702 | -17.07765  |
| O | 2.058849  | -15.911727 | -18.39598  | W | 4.038383  | -9.703949  | -15.019933 |
| O | -0.54729  | -9.471244  | -13.962572 | W | 1.403634  | -14.576096 | -19.636004 |
| O | 5.250788  | -13.89     | -13.095518 | O | 6.030782  | -14.571882 | -20.628813 |
| O | 0.560975  | -9.174783  | -16.468085 | O | 7.824013  | -11.328863 | -17.225076 |
| O | 2.682895  | -13.419966 | -14.112586 | O | 2.541693  | -11.032885 | -18.471766 |
| O | 4.468558  | -8.49757   | -13.869447 | O | 2.942477  | -13.516405 | -18.081034 |
| O | 3.359104  | -8.731452  | -16.379994 | O | 1.326599  | -12.220911 | -16.559384 |
| O | 3.577464  | -8.701738  | -19.307033 | O | 3.83357   | -11.792263 | -16.403146 |
| O | 1.80407   | -15.076434 | -15.888203 | P | 2.658607  | -12.15001  | -17.372209 |
| O | -2.516505 | -13.002573 | -17.792904 | O | -1.560903 | -7.633181  | -18.276687 |
| O | 2.61578   | -10.558258 | -21.011155 | H | -1.218426 | -8.065353  | -17.467298 |
| O | 0.309888  | -14.863742 | -13.484483 | H | -1.007175 | -8.107856  | -18.932133 |

|                                                                              |           |            |            |   |           |            |            |
|------------------------------------------------------------------------------|-----------|------------|------------|---|-----------|------------|------------|
| [PW <sub>11</sub> O <sub>39</sub> Fe(H <sub>2</sub> O)] <sup>3-</sup> 2S+I=1 |           |            |            | O | 0.912686  | -9.373714  | -19.269773 |
| Fe                                                                           | 2.138249  | -9.261526  | -18.017598 | O | 5.675475  | -10.179093 | -15.875449 |
| O                                                                            | 4.346895  | -14.750887 | -15.775493 | O | 1.251279  | -12.902550 | -20.453312 |
| O                                                                            | 0.321786  | -12.236043 | -14.150701 | O | 5.192333  | -9.753845  | -21.229594 |
| O                                                                            | 4.490558  | -12.327401 | -20.262121 | O | 3.497737  | -17.352545 | -16.445335 |
| O                                                                            | 3.269772  | -14.681091 | -20.412764 | O | -0.580868 | -14.031770 | -15.887397 |
| O                                                                            | -0.391546 | -11.665806 | -18.829206 | O | -0.269965 | -10.725030 | -21.468345 |
| O                                                                            | 4.629146  | -15.546819 | -18.312322 | W | 0.341921  | -10.531298 | -15.251345 |

|   |           |            |            |   |           |            |            |
|---|-----------|------------|------------|---|-----------|------------|------------|
| O | 5.850006  | -13.123551 | -18.196942 | W | -0.855079 | -12.944728 | -17.403530 |
| O | 2.131181  | -10.339636 | -14.548189 | W | 0.775464  | -11.109864 | -20.179615 |
| O | -1.055614 | -11.434819 | -16.248350 | W | 0.946115  | -13.904435 | -14.665029 |
| O | 4.477156  | -11.497667 | -13.941593 | W | 4.216441  | -10.491475 | -20.044139 |
| O | 5.413884  | -10.607249 | -18.542818 | W | 4.610024  | -13.275199 | -14.539483 |
| O | 6.145757  | -12.774549 | -15.569778 | W | 4.872370  | -14.090267 | -19.479149 |
| O | 0.099599  | -14.170662 | -18.512736 | W | 3.233668  | -15.743288 | -16.928678 |
| O | 0.688444  | -15.647532 | -20.859786 | W | 6.150314  | -11.563720 | -17.068594 |
| O | 2.052441  | -16.008395 | -18.460192 | W | 3.924348  | -9.915919  | -15.010179 |
| O | -0.579599 | -9.489294  | -14.262602 | W | 1.503061  | -14.693076 | -19.712169 |
| O | 5.347565  | -14.043003 | -13.213540 | O | 6.083077  | -14.678011 | -20.519050 |
| O | 0.817860  | -9.475694  | -16.634015 | O | 7.819130  | -11.296145 | -17.258580 |
| O | 2.732161  | -13.535105 | -14.163825 | O | 2.483546  | -11.127209 | -18.417692 |
| O | 4.304577  | -8.629300  | -13.954637 | O | 2.934505  | -13.585795 | -18.097835 |
| O | 3.299361  | -9.054580  | -16.501129 | O | 1.327344  | -12.376285 | -16.514303 |
| O | 3.486539  | -8.922441  | -19.136627 | O | 3.835377  | -11.910041 | -16.393881 |
| O | 1.784282  | -15.210163 | -15.890942 | P | 2.646233  | -12.266903 | -17.328668 |
| O | -2.475702 | -13.299805 | -17.775662 | O | 2.003266  | -7.235482  | -17.838694 |
| O | 2.513065  | -10.563828 | -20.926691 | H | 2.767576  | -7.088286  | -18.435562 |
| O | 0.407559  | -14.902038 | -13.396882 | H | 2.402294  | -7.240681  | -16.941785 |

|                                                                              |           |            |            |   |           |            |            |
|------------------------------------------------------------------------------|-----------|------------|------------|---|-----------|------------|------------|
| [PW <sub>11</sub> O <sub>39</sub> Fe(H <sub>2</sub> O)] <sup>3-</sup> 2S+1=3 |           |            |            | O | 0.862885  | -9.417128  | -19.406132 |
| Fe                                                                           | 2.037088  | -9.311267  | -17.929877 | O | 5.710743  | -10.169573 | -15.907551 |
| O                                                                            | 4.321587  | -14.692385 | -15.720780 | O | 1.244737  | -12.966332 | -20.375746 |
| O                                                                            | 0.322302  | -12.244590 | -14.106243 | O | 5.207952  | -9.670359  | -21.157214 |
| O                                                                            | 4.515253  | -12.321289 | -20.243987 | O | 3.667907  | -17.333464 | -16.450137 |
| O                                                                            | 3.250402  | -14.738921 | -20.368442 | O | -0.613543 | -13.969163 | -15.876316 |
| O                                                                            | -0.404476 | -11.701440 | -18.882555 | O | -0.175391 | -10.756005 | -21.591106 |
| O                                                                            | 4.689164  | -15.521710 | -18.290149 | W | 0.405079  | -10.669642 | -15.095576 |
| O                                                                            | 5.850838  | -13.159103 | -18.184291 | W | -0.880411 | -12.820893 | -17.465687 |

|   |           |            |            |   |          |            |            |
|---|-----------|------------|------------|---|----------|------------|------------|
| O | 2.165415  | -10.273470 | -14.612372 | W | 0.846215 | -11.055812 | -20.262181 |
| O | -1.022137 | -11.384201 | -16.234045 | W | 0.906093 | -14.045090 | -14.767954 |
| O | 4.444053  | -11.405816 | -13.933741 | W | 4.222422 | -10.401245 | -19.977600 |
| O | 5.396428  | -10.625083 | -18.513122 | W | 4.500591 | -13.210685 | -14.466854 |
| O | 6.104574  | -12.750870 | -15.503760 | W | 4.816602 | -14.045274 | -19.577177 |
| O | 0.057721  | -14.217950 | -18.418766 | W | 3.368193 | -15.740113 | -16.963382 |
| O | 0.618258  | -15.685232 | -20.742664 | W | 6.162213 | -11.685410 | -17.064927 |
| O | 2.088508  | -15.999097 | -18.370196 | W | 4.033971 | -9.849828  | -15.089307 |
| O | -0.491614 | -9.565352  | -14.155030 | W | 1.427833 | -14.687841 | -19.627958 |
| O | 5.216408  | -13.947133 | -13.111117 | O | 6.025230 | -14.642768 | -20.613585 |
| O | 0.807661  | -9.606610  | -16.743579 | O | 7.832722 | -11.427914 | -17.253216 |
| O | 2.662150  | -13.471745 | -14.152164 | O | 2.458778 | -11.126032 | -18.392693 |
| O | 4.400788  | -8.539827  | -14.058492 | O | 2.944133 | -13.577654 | -18.082408 |
| O | 3.328624  | -9.001870  | -16.555306 | O | 1.329278 | -12.394638 | -16.495129 |
| O | 3.389600  | -8.919775  | -19.199399 | O | 3.835746 | -11.889476 | -16.381799 |
| O | 1.807420  | -15.254883 | -15.847973 | P | 2.648621 | -12.269557 | -17.306133 |
| O | -2.512894 | -13.157872 | -17.801292 | O | 1.916258 | -7.271133  | -17.818241 |
| O | 2.575027  | -10.706095 | -20.978435 | H | 2.499546 | -7.155207  | -18.599083 |
| O | 0.356152  | -15.017334 | -13.485066 | H | 2.540721 | -7.258696  | -17.056392 |

|                                                                              |           |            |            |   |           |            |            |
|------------------------------------------------------------------------------|-----------|------------|------------|---|-----------|------------|------------|
| [PW <sub>11</sub> O <sub>39</sub> Fe(H <sub>2</sub> O)] <sup>3-</sup> 2S+1=5 |           |            |            | O | 0.707483  | -9.435548  | -19.303284 |
| Fe                                                                           | 1.956638  | -9.242533  | -17.901450 | O | 5.478892  | -9.979349  | -15.925415 |
| O                                                                            | 4.398098  | -14.672684 | -15.743581 | O | 1.183262  | -12.989973 | -20.401408 |
| O                                                                            | 0.278139  | -12.270326 | -14.142312 | O | 4.915436  | -9.703046  | -21.290311 |
| O                                                                            | 4.416461  | -12.282375 | -20.215325 | O | 3.614594  | -17.330433 | -16.462971 |
| O                                                                            | 3.329435  | -14.704216 | -20.379265 | O | -0.544145 | -14.136977 | -15.828237 |
| O                                                                            | -0.490048 | -11.850816 | -18.804577 | O | -0.443236 | -10.818131 | -21.412787 |
| O                                                                            | 4.720942  | -15.460688 | -18.256541 | W | 0.165155  | -10.675442 | -15.269580 |
| O                                                                            | 5.840171  | -12.984940 | -18.157288 | W | -0.866701 | -13.159851 | -17.419528 |
| O                                                                            | 1.965453  | -10.306227 | -14.628575 | W | 0.631051  | -11.102379 | -20.124377 |

|   |           |            |            |   |          |            |            |
|---|-----------|------------|------------|---|----------|------------|------------|
| O | -1.150262 | -11.598330 | -16.262751 | W | 1.004162 | -13.950128 | -14.646971 |
| O | 4.376936  | -11.370351 | -13.945751 | W | 3.980293 | -10.428712 | -20.069985 |
| O | 5.249759  | -10.490993 | -18.575357 | W | 4.628103 | -13.227024 | -14.594078 |
| O | 6.106687  | -12.537458 | -15.555897 | W | 4.897290 | -13.981947 | -19.447637 |
| O | 0.119682  | -14.357738 | -18.467274 | W | 3.281580 | -15.744040 | -16.977115 |
| O | 0.783326  | -15.703025 | -20.895247 | W | 6.033695 | -11.361654 | -17.118005 |
| O | 2.139634  | -16.050373 | -18.434695 | W | 3.773573 | -9.911880  | -14.964573 |
| O | -0.788027 | -9.643095  | -14.309041 | W | 1.545330 | -14.696201 | -19.757439 |
| O | 5.397500  | -13.922877 | -13.247209 | O | 6.138125 | -14.525600 | -20.473568 |
| O | 0.604497  | -9.557405  | -16.719243 | O | 7.682550 | -10.997149 | -17.305173 |
| O | 2.745520  | -13.443542 | -14.153696 | O | 2.378731 | -11.208099 | -18.441510 |
| O | 4.065840  | -8.592100  | -13.931348 | O | 2.936185 | -13.633319 | -18.060222 |
| O | 3.110174  | -9.012789  | -16.578834 | O | 1.278275 | -12.443817 | -16.514674 |
| O | 3.225252  | -8.900484  | -19.199705 | O | 3.762105 | -11.865338 | -16.404057 |
| O | 1.875518  | -15.222031 | -15.832117 | P | 2.593122 | -12.301608 | -17.335320 |
| O | -2.474224 | -13.595158 | -17.759581 | O | 5.656045 | -7.074609  | -17.701042 |
| O | 2.340515  | -10.693701 | -20.979516 | H | 4.964722 | -7.573264  | -18.179065 |
| O | 0.519236  | -14.928688 | -13.344362 | H | 5.868945 | -7.710582  | -16.994239 |

|                                                                |           |            |            |   |           |            |            |
|----------------------------------------------------------------|-----------|------------|------------|---|-----------|------------|------------|
| [PW <sub>11</sub> O <sub>39</sub> Fe(OH)] <sup>4-</sup> 2S+1=1 |           |            |            | O | 0.898096  | -9.332395  | -19.374038 |
| Fe                                                             | 2.157569  | -9.139347  | -17.977649 | O | 5.697298  | -10.189296 | -15.871651 |
| O                                                              | 4.309460  | -14.733886 | -15.767245 | O | 1.257336  | -12.913299 | -20.398069 |
| O                                                              | 0.331939  | -12.216665 | -14.146672 | O | 5.172498  | -9.815144  | -21.256825 |
| O                                                              | 4.501669  | -12.378198 | -20.218346 | O | 3.470201  | -17.364613 | -16.449284 |
| O                                                              | 3.295750  | -14.732333 | -20.399548 | O | -0.584034 | -14.018504 | -15.860552 |
| O                                                              | -0.401416 | -11.694395 | -18.825936 | O | -0.283752 | -10.684722 | -21.452394 |
| O                                                              | 4.638295  | -15.563237 | -18.275311 | W | 0.354447  | -10.570903 | -15.285630 |
| O                                                              | 5.889500  | -13.163945 | -18.167186 | W | -0.845702 | -12.981644 | -17.427244 |
| O                                                              | 2.151298  | -10.332472 | -14.578994 | W | 0.764633  | -10.994496 | -20.136359 |
| O                                                              | -1.049665 | -11.446706 | -16.260786 | W | 0.956370  | -13.912051 | -14.649638 |

|   |           |            |            |   |          |            |            |
|---|-----------|------------|------------|---|----------|------------|------------|
| O | 4.474219  | -11.501084 | -13.947515 | W | 4.180188 | -10.507027 | -20.047670 |
| O | 5.432650  | -10.645366 | -18.544693 | W | 4.615627 | -13.270048 | -14.542227 |
| O | 6.154812  | -12.783898 | -15.559063 | W | 4.893265 | -14.106631 | -19.455713 |
| O | 0.085671  | -14.224868 | -18.487147 | W | 3.200803 | -15.750246 | -16.942231 |
| O | 0.700631  | -15.608394 | -20.900599 | W | 6.161381 | -11.570884 | -17.077797 |
| O | 2.046463  | -15.991425 | -18.437893 | W | 3.937989 | -9.886512  | -15.029217 |
| O | -0.560709 | -9.491255  | -14.319221 | W | 1.512498 | -14.636100 | -19.752482 |
| O | 5.351979  | -14.044447 | -13.208201 | O | 6.109429 | -14.713786 | -20.491921 |
| O | 0.857490  | -9.561052  | -16.708725 | O | 7.839616 | -11.305379 | -17.258974 |
| O | 2.721276  | -13.525710 | -14.134084 | O | 2.475060 | -11.114746 | -18.402522 |
| O | 4.334713  | -8.634963  | -13.926593 | O | 2.944781 | -13.596550 | -18.093620 |
| O | 3.356430  | -8.978337  | -16.487396 | O | 1.339436 | -12.404987 | -16.511653 |
| O | 3.495951  | -8.965153  | -19.189484 | O | 3.846180 | -11.906082 | -16.401125 |
| O | 1.762878  | -15.227477 | -15.848230 | P | 2.654425 | -12.263478 | -17.340250 |
| O | -2.478429 | -13.337426 | -17.782116 | O | 1.882384 | -7.352519  | -17.851888 |
| O | 2.524541  | -10.672686 | -20.968267 | H | 2.434734 | -7.169631  | -17.062150 |
| O | 0.400923  | -14.888704 | -13.361458 |   |          |            |            |

|                                                                |           |            |            |   |           |            |            |
|----------------------------------------------------------------|-----------|------------|------------|---|-----------|------------|------------|
| [PW <sub>11</sub> O <sub>39</sub> Fe(OH)] <sup>4-</sup> 2S+1=3 |           |            |            | O | 0.908467  | -9.335700  | -19.374967 |
| Fe                                                             | 2.164296  | -9.141036  | -17.972279 | O | 5.695361  | -10.189458 | -15.872166 |
| O                                                              | 4.310644  | -14.737668 | -15.760370 | O | 1.253591  | -12.920033 | -20.400903 |
| O                                                              | 0.329305  | -12.212460 | -14.148588 | O | 5.171955  | -9.814685  | -21.263597 |
| O                                                              | 4.503752  | -12.378898 | -20.211168 | O | 3.465474  | -17.365912 | -16.448140 |
| O                                                              | 3.293695  | -14.736370 | -20.395923 | O | -0.583977 | -14.013394 | -15.861438 |
| O                                                              | -0.393638 | -11.693660 | -18.826423 | O | -0.275357 | -10.685144 | -21.454576 |
| O                                                              | 4.633644  | -15.560613 | -18.269973 | W | 0.349047  | -10.565447 | -15.284372 |
| O                                                              | 5.890708  | -13.167332 | -18.159423 | W | -0.844222 | -12.980359 | -17.428388 |
| O                                                              | 2.145270  | -10.327584 | -14.581594 | W | 0.773143  | -11.000601 | -20.140197 |
| O                                                              | -1.049648 | -11.441446 | -16.263908 | W | 0.958778  | -13.907110 | -14.649087 |
| O                                                              | 4.470722  | -11.500565 | -13.946092 | W | 4.176243  | -10.496494 | -20.052058 |

|   |           |            |            |   |          |            |            |
|---|-----------|------------|------------|---|----------|------------|------------|
| O | 5.435821  | -10.646676 | -18.547342 | W | 4.620042 | -13.276084 | -14.545368 |
| O | 6.154751  | -12.780033 | -15.554536 | W | 4.892177 | -14.099361 | -19.454611 |
| O | 0.084674  | -14.225699 | -18.487390 | W | 3.199706 | -15.752087 | -16.944376 |
| O | 0.699348  | -15.615897 | -20.899069 | W | 6.161430 | -11.567196 | -17.082514 |
| O | 2.041957  | -15.995851 | -18.435150 | W | 3.937739 | -9.899434  | -15.022656 |
| O | -0.566523 | -9.493434  | -14.310571 | W | 1.511150 | -14.641903 | -19.752489 |
| O | 5.353865  | -14.047126 | -13.208101 | O | 6.107900 | -14.710112 | -20.489139 |
| O | 0.843140  | -9.542369  | -16.704979 | O | 7.840000 | -11.302084 | -17.260904 |
| O | 2.721362  | -13.519990 | -14.133605 | O | 2.481376 | -11.113469 | -18.402173 |
| O | 4.333655  | -8.644205  | -13.924243 | O | 2.942078 | -13.596831 | -18.093363 |
| O | 3.355419  | -8.990239  | -16.490318 | O | 1.339044 | -12.399192 | -16.512767 |
| O | 3.498399  | -8.955969  | -19.210657 | O | 3.847616 | -11.909973 | -16.400278 |
| O | 1.764218  | -15.220501 | -15.849178 | P | 2.655193 | -12.264253 | -17.339059 |
| O | -2.477253 | -13.333400 | -17.784654 | O | 1.888640 | -7.351763  | -17.846645 |
| O | 2.528793  | -10.689275 | -20.975309 | H | 2.339279 | -7.188010  | -16.991529 |
| O | 0.402257  | -14.883827 | -13.361436 |   |          |            |            |

|                                                                |           |            |            |   |           |            |            |
|----------------------------------------------------------------|-----------|------------|------------|---|-----------|------------|------------|
| [PW <sub>11</sub> O <sub>39</sub> Fe(OH)] <sup>4-</sup> 2S+1=5 |           |            |            | O | 0.959095  | -9.327670  | -19.319324 |
| Fe                                                             | 2.035023  | -9.001723  | -17.960457 | O | 5.633336  | -10.192111 | -15.953742 |
| O                                                              | 4.394170  | -14.770283 | -15.705532 | O | 1.262709  | -12.951415 | -20.393388 |
| O                                                              | 0.341904  | -12.294794 | -14.145160 | O | 5.279158  | -9.741185  | -21.270711 |
| O                                                              | 4.507971  | -12.363950 | -20.238082 | O | 3.606459  | -17.358047 | -16.430375 |
| O                                                              | 3.226978  | -14.756731 | -20.400387 | O | -0.592742 | -14.054501 | -15.917576 |
| O                                                              | -0.327725 | -11.649731 | -18.787476 | O | -0.136762 | -10.771508 | -21.464274 |
| O                                                              | 4.626379  | -15.549016 | -18.303739 | W | 0.344044  | -10.542159 | -15.181286 |
| O                                                              | 5.861431  | -13.215167 | -18.173339 | W | -0.865296 | -12.866239 | -17.415557 |
| O                                                              | 2.136392  | -10.328102 | -14.579297 | W | 0.919042  | -11.134871 | -20.169344 |
| O                                                              | -1.096457 | -11.466923 | -16.175009 | W | 0.910105  | -13.967526 | -14.727945 |
| O                                                              | 4.449495  | -11.445817 | -13.947057 | W | 4.265879  | -10.342514 | -20.026360 |
| O                                                              | 5.494931  | -10.672309 | -18.580623 | W | 4.551296  | -13.255059 | -14.484944 |

|   |           |            |            |   |          |            |            |
|---|-----------|------------|------------|---|----------|------------|------------|
| O | 6.111905  | -12.760112 | -15.520941 | W | 4.812293 | -14.045619 | -19.580993 |
| O | 0.064309  | -14.198786 | -18.488544 | W | 3.345101 | -15.742689 | -16.925145 |
| O | 0.626964  | -15.731306 | -20.767485 | W | 6.152887 | -11.684589 | -17.108806 |
| O | 2.045284  | -16.064659 | -18.405306 | W | 3.951975 | -9.913315  | -15.090486 |
| O | -0.565648 | -9.546566  | -14.122092 | W | 1.456939 | -14.772315 | -19.621921 |
| O | 5.287859  | -13.975208 | -13.121694 | O | 6.020269 | -14.668903 | -20.618372 |
| O | 0.653710  | -9.504428  | -16.597397 | O | 7.836568 | -11.432039 | -17.244797 |
| O | 2.719391  | -13.535571 | -14.149048 | O | 2.505212 | -11.129516 | -18.427521 |
| O | 4.344879  | -8.627594  | -14.032281 | O | 2.927075 | -13.628736 | -18.086219 |
| O | 3.243473  | -8.997177  | -16.556061 | O | 1.311720 | -12.382353 | -16.533427 |
| O | 3.630370  | -8.855436  | -19.280788 | O | 3.820787 | -11.938148 | -16.404179 |
| O | 1.836755  | -15.203332 | -15.900006 | P | 2.632033 | -12.275109 | -17.361588 |
| O | -2.492489 | -13.204658 | -17.812460 | O | 1.767654 | -7.144425  | -17.875117 |
| O | 2.597261  | -10.653602 | -20.965563 | H | 2.338379 | -6.939117  | -17.107539 |
| O | 0.374846  | -14.990704 | -13.467366 |   |          |            |            |

|                                                               |           |            |            |   |           |            |            |
|---------------------------------------------------------------|-----------|------------|------------|---|-----------|------------|------------|
| [PW <sub>11</sub> O <sub>39</sub> Fe(O)] <sup>5-</sup> 2S+1=3 |           |            |            | O | 0.871246  | -9.374401  | -19.401254 |
| Fe                                                            | 2.094906  | -9.010466  | -17.953738 | O | 5.700589  | -10.224262 | -15.880115 |
| O                                                             | 4.345119  | -14.758526 | -15.734194 | O | 1.253812  | -12.971943 | -20.381643 |
| O                                                             | 0.351996  | -12.260678 | -14.145024 | O | 5.208827  | -9.751346  | -21.227385 |
| O                                                             | 4.515656  | -12.377457 | -20.212378 | O | 3.541432  | -17.378053 | -16.445901 |
| O                                                             | 3.271988  | -14.769905 | -20.398728 | O | -0.582019 | -14.037574 | -15.878853 |
| O                                                             | -0.382166 | -11.726084 | -18.837102 | O | -0.215054 | -10.740246 | -21.508189 |
| O                                                             | 4.644267  | -15.551913 | -18.280170 | W | 0.380014  | -10.534838 | -15.252698 |
| O                                                             | 5.884740  | -13.200192 | -18.161467 | W | -0.849301 | -12.933028 | -17.434841 |
| O                                                             | 2.166063  | -10.371634 | -14.556096 | W | 0.830828  | -11.012512 | -20.170099 |
| O                                                             | -1.042032 | -11.453508 | -16.230983 | W | 0.933790  | -13.943499 | -14.679412 |
| O                                                             | 4.478402  | -11.508832 | -13.930354 | W | 4.196940  | -10.398675 | -19.996303 |
| O                                                             | 5.444045  | -10.663879 | -18.534756 | W | 4.584613  | -13.278257 | -14.490258 |
| O                                                             | 6.147313  | -12.810831 | -15.529418 | W | 4.850399  | -14.070249 | -19.528254 |

|   |           |            |            |   |          |            |            |
|---|-----------|------------|------------|---|----------|------------|------------|
| O | 0.062983  | -14.261647 | -18.464578 | W | 3.271801 | -15.754911 | -16.944467 |
| O | 0.655855  | -15.678519 | -20.849120 | W | 6.162627 | -11.653108 | -17.070959 |
| O | 2.056990  | -16.023392 | -18.414815 | W | 3.954932 | -9.883152  | -15.066175 |
| O | -0.549741 | -9.525248  | -14.211798 | W | 1.469817 | -14.686754 | -19.704419 |
| O | 5.328966  | -14.044304 | -13.143393 | O | 6.072008 | -14.691267 | -20.566763 |
| O | 0.776693  | -9.470019  | -16.630405 | O | 7.851243 | -11.391571 | -17.244378 |
| O | 2.723868  | -13.553925 | -14.114692 | O | 2.497959 | -11.096158 | -18.395422 |
| O | 4.360404  | -8.630376  | -13.955620 | O | 2.940465 | -13.607375 | -18.098409 |
| O | 3.350508  | -9.000879  | -16.496362 | O | 1.335799 | -12.391724 | -16.525589 |
| O | 3.507068  | -8.893939  | -19.264335 | O | 3.847959 | -11.933654 | -16.394992 |
| O | 1.800753  | -15.221823 | -15.866776 | P | 2.656598 | -12.262774 | -17.354068 |
| O | -2.495425 | -13.279375 | -17.781541 | O | 1.799189 | -7.396335  | -17.922997 |
| O | 2.568196  | -10.745727 | -20.980457 |   |          |            |            |
| O | 0.375334  | -14.946944 | -13.400289 |   |          |            |            |

|                                                               |           |            |            |   |           |            |            |
|---------------------------------------------------------------|-----------|------------|------------|---|-----------|------------|------------|
| [PW <sub>11</sub> O <sub>39</sub> Fe(O)] <sup>5-</sup> 2S+1=5 |           |            |            | O | 0.767245  | -9.396182  | -19.496340 |
| Fe                                                            | 2.036638  | -8.950942  | -17.982825 | O | 5.705035  | -10.217834 | -15.885179 |
| O                                                             | 4.367168  | -14.748314 | -15.724952 | O | 1.269574  | -13.000668 | -20.373950 |
| O                                                             | 0.376280  | -12.300099 | -14.138505 | O | 5.268708  | -9.789199  | -21.239148 |
| O                                                             | 4.504925  | -12.375438 | -20.236577 | O | 3.611641  | -17.370478 | -16.444580 |
| O                                                             | 3.262332  | -14.791028 | -20.395415 | O | -0.586586 | -14.046635 | -15.892929 |
| O                                                             | -0.377264 | -11.731980 | -18.854758 | O | -0.169870 | -10.858748 | -21.612848 |
| O                                                             | 4.667700  | -15.537019 | -18.282834 | W | 0.399703  | -10.545674 | -15.177781 |
| O                                                             | 5.866998  | -13.185811 | -18.181456 | W | -0.855365 | -12.873012 | -17.439496 |
| O                                                             | 2.176131  | -10.315908 | -14.548321 | W | 0.855247  | -11.036523 | -20.241687 |
| O                                                             | -1.046830 | -11.460057 | -16.197138 | W | 0.906694  | -13.992317 | -14.715742 |
| O                                                             | 4.479631  | -11.505169 | -13.918605 | W | 4.241027  | -10.370946 | -19.986763 |
| O                                                             | 5.426871  | -10.647669 | -18.531272 | W | 4.541896  | -13.278315 | -14.450496 |
| O                                                             | 6.136301  | -12.805667 | -15.516560 | W | 4.815933  | -14.064436 | -19.579203 |
| O                                                             | 0.054617  | -14.264660 | -18.445789 | W | 3.328850  | -15.750876 | -16.946355 |



|   |           |            |            |   |          |            |            |
|---|-----------|------------|------------|---|----------|------------|------------|
| O | 0.625225  | -15.711226 | -20.793035 | W | 6.154189 | -11.705089 | -17.055026 |
| O | 2.081265  | -16.027602 | -18.391466 | W | 4.000389 | -9.858634  | -15.058599 |
| O | -0.537505 | -9.581940  | -14.099582 | W | 1.436775 | -14.705444 | -19.658606 |
| O | 5.301936  | -14.039336 | -13.109358 | O | 6.044780 | -14.681353 | -20.612152 |
| O | 0.694630  | -9.471902  | -16.573240 | O | 7.841145 | -11.439101 | -17.233994 |
| O | 2.720102  | -13.574558 | -14.095765 | O | 2.490558 | -11.057603 | -18.396114 |
| O | 4.421374  | -8.627513  | -13.928889 | O | 2.940042 | -13.581944 | -18.107803 |
| O | 3.380553  | -8.953110  | -16.460762 | O | 1.331440 | -12.377655 | -16.530976 |
| O | 3.547006  | -8.840008  | -19.341160 | O | 3.839197 | -11.917896 | -16.391187 |
| O | 1.829690  | -15.226070 | -15.870150 | P | 2.651353 | -12.236170 | -17.361546 |
| O | -2.501099 | -13.223373 | -17.783371 | O | 1.716042 | -7.346244  | -17.960564 |
| O | 2.577574  | -10.716333 | -20.983094 |   |          |            |            |
| O | 0.351108  | -15.010923 | -13.447529 |   |          |            |            |

|                                                               |           |            |            |   |           |            |            |
|---------------------------------------------------------------|-----------|------------|------------|---|-----------|------------|------------|
| [PW <sub>11</sub> O <sub>39</sub> Fe(O)] <sup>4-</sup> 2S+1=2 |           |            |            | O | 0.880999  | -9.388688  | -19.342589 |
| Fe                                                            | 2.075334  | -9.057738  | -17.997302 | O | 5.702793  | -10.221139 | -15.895375 |
| O                                                             | 4.369194  | -14.754194 | -15.737754 | O | 1.271150  | -12.946679 | -20.386233 |
| O                                                             | 0.355322  | -12.267641 | -14.156708 | O | 5.230444  | -9.720867  | -21.162824 |
| O                                                             | 4.476875  | -12.327555 | -20.226209 | O | 3.584182  | -17.347595 | -16.451874 |
| O                                                             | 3.246933  | -14.729923 | -20.419021 | O | -0.591422 | -14.037812 | -15.902002 |
| O                                                             | -0.380098 | -11.694572 | -18.824771 | O | -0.192556 | -10.782286 | -21.498141 |
| O                                                             | 4.644862  | -15.529766 | -18.318258 | W | 0.399138  | -10.548668 | -15.238248 |
| O                                                             | 5.855269  | -13.165972 | -18.192608 | W | -0.869950 | -12.896557 | -17.427012 |
| O                                                             | 2.176179  | -10.352063 | -14.578258 | W | 0.853132  | -11.096373 | -20.181707 |
| O                                                             | -1.049718 | -11.444373 | -16.221159 | W | 0.919550  | -13.952813 | -14.713684 |
| O                                                             | 4.483513  | -11.485530 | -13.930480 | W | 4.238296  | -10.410522 | -19.952123 |
| O                                                             | 5.443449  | -10.631556 | -18.514273 | W | 4.561478  | -13.255790 | -14.467426 |
| O                                                             | 6.145947  | -12.811063 | -15.520946 | W | 4.812457  | -14.060294 | -19.557241 |
| O                                                             | 0.054118  | -14.223878 | -18.486286 | W | 3.312851  | -15.729507 | -16.931587 |
| O                                                             | 0.639149  | -15.688563 | -20.813272 | W | 6.172180  | -11.687697 | -17.050521 |

|   |           |            |            |   |          |            |            |
|---|-----------|------------|------------|---|----------|------------|------------|
| O | 2.066611  | -16.024183 | -18.434081 | W | 3.974799 | -9.881528  | -15.093272 |
| O | -0.517629 | -9.532390  | -14.207957 | W | 1.454683 | -14.723096 | -19.662721 |
| O | 5.295951  | -14.015345 | -13.123862 | O | 6.026627 | -14.647845 | -20.606870 |
| O | 0.786828  | -9.494869  | -16.645329 | O | 7.851501 | -11.434785 | -17.235081 |
| O | 2.721814  | -13.557006 | -14.136325 | O | 2.503938 | -11.104247 | -18.393715 |
| O | 4.369028  | -8.613732  | -14.010774 | O | 2.937338 | -13.605455 | -18.095222 |
| O | 3.327001  | -9.023926  | -16.532884 | O | 1.332640 | -12.390657 | -16.526437 |
| O | 3.469425  | -8.882076  | -19.212395 | O | 3.845738 | -11.939665 | -16.387528 |
| O | 1.812854  | -15.213531 | -15.900001 | P | 2.656162 | -12.265742 | -17.345263 |
| O | -2.505137 | -13.237242 | -17.785410 | O | 1.768212 | -7.441574  | -17.936102 |
| O | 2.555276  | -10.632643 | -20.941788 |   |          |            |            |
| O | 0.370987  | -14.961954 | -13.448122 |   |          |            |            |

|                                                               |           |            |            |   |           |            |            |
|---------------------------------------------------------------|-----------|------------|------------|---|-----------|------------|------------|
| [PW <sub>11</sub> O <sub>39</sub> Fe(O)] <sup>4-</sup> 2S+1=4 |           |            |            | O | 0.876581  | -9.3887209 | -19.350318 |
| Fe                                                            | 2.072135  | -9.052310  | -17.980619 | O | 5.703396  | -10.212697 | -15.900877 |
| O                                                             | 4.368264  | -14.745061 | -15.736499 | O | 1.264643  | -12.952359 | -20.374167 |
| O                                                             | 0.359578  | -12.263261 | -14.154350 | O | 5.219017  | -9.720525  | -21.161639 |
| O                                                             | 4.490372  | -12.333524 | -20.225066 | O | 3.591181  | -17.346429 | -16.448653 |
| O                                                             | 3.251839  | -14.735364 | -20.411417 | O | -0.591886 | -14.032460 | -15.896657 |
| O                                                             | -0.382243 | -11.704547 | -18.828450 | O | -0.183982 | -10.769420 | -21.500782 |
| O                                                             | 4.655180  | -15.530360 | -18.309401 | W | 0.400213  | -10.561747 | -15.230163 |
| O                                                             | 5.861807  | -13.166533 | -18.191655 | W | -0.871100 | -12.889613 | -17.437842 |
| O                                                             | 2.176346  | -10.337526 | -14.589121 | W | 0.863935  | -11.076626 | -20.184718 |
| O                                                             | -1.049562 | -11.444662 | -16.220109 | W | 0.913570  | -13.959338 | -14.719525 |
| O                                                             | 4.481015  | -11.475294 | -13.934536 | W | 4.228699  | -10.418024 | -19.954248 |
| O                                                             | 5.431723  | -10.631362 | -18.512733 | W | 4.553533  | -13.255325 | -14.470620 |
| O                                                             | 6.144576  | -12.798921 | -15.519390 | W | 4.816208  | -14.066870 | -19.557861 |
| O                                                             | 0.053169  | -14.236897 | -18.472280 | W | 3.314429  | -15.731519 | -16.935209 |
| O                                                             | 0.638788  | -15.685520 | -20.807185 | W | 6.172975  | -11.689130 | -17.055217 |
| O                                                             | 2.074071  | -16.021704 | -18.424526 | W | 3.985049  | -9.884777  | -15.091856 |

|   |           |            |            |   |          |            |            |
|---|-----------|------------|------------|---|----------|------------|------------|
| O | -0.516017 | -9.544725  | -14.201101 | W | 1.450167 | -14.713595 | -19.659216 |
| O | 5.289665  | -14.009223 | -13.124899 | O | 6.031125 | -14.657954 | -20.604501 |
| O | 0.779098  | -9.503707  | -16.652925 | O | 7.851229 | -11.430266 | -17.241921 |
| O | 2.718933  | -13.546341 | -14.136237 | O | 2.502934 | -11.106819 | -18.395785 |
| O | 4.376389  | -8.616336  | -14.010010 | O | 2.940850 | -13.606387 | -18.093315 |
| O | 3.333885  | -9.018261  | -16.538992 | O | 1.333088 | -12.392844 | -16.527497 |
| O | 3.453658  | -8.883395  | -19.216916 | O | 3.845742 | -11.936389 | -16.388782 |
| O | 1.816940  | -15.216380 | -15.888426 | P | 2.656724 | -12.267149 | -17.344947 |
| O | -2.506864 | -13.232535 | -17.791831 | O | 1.759205 | -7.440692  | -17.915677 |
| O | 2.561996  | -10.663532 | -20.952628 |   |          |            |            |
| O | 0.368216  | -14.962992 | -13.448316 |   |          |            |            |

|                                                                  |           |            |            |   |           |            |            |
|------------------------------------------------------------------|-----------|------------|------------|---|-----------|------------|------------|
| $[\text{PW}_{11}\text{O}_{39}\text{Fe}(\text{O})]^{4-}$ $2S+1=6$ |           |            |            | O | 0.768094  | -9.352496  | -19.513494 |
| Fe                                                               | 2.197260  | -8.988500  | -17.981504 | O | 5.609367  | -10.146816 | -15.866316 |
| O                                                                | 4.368585  | -14.780185 | -15.728897 | O | 1.257667  | -12.983900 | -20.421724 |
| O                                                                | 0.381142  | -12.169554 | -14.153910 | O | 5.160031  | -9.886621  | -21.353068 |
| O                                                                | 4.497550  | -12.400170 | -20.184676 | O | 3.448430  | -17.393344 | -16.446170 |
| O                                                                | 3.305696  | -14.794435 | -20.379500 | O | -0.539887 | -13.988927 | -15.849660 |
| O                                                                | -0.384361 | -11.745316 | -18.854962 | O | -0.299757 | -10.810909 | -21.548861 |
| O                                                                | 4.639966  | -15.549230 | -18.225781 | W | 0.296617  | -10.519644 | -15.312383 |
| O                                                                | 5.887600  | -13.165944 | -18.120838 | W | -0.810645 | -12.994707 | -17.447586 |
| O                                                                | 2.132631  | -10.233936 | -14.527836 | W | 0.738855  | -10.988500 | -20.198900 |
| O                                                                | -1.053915 | -11.428128 | -16.277935 | W | 0.997772  | -13.861175 | -14.642337 |
| O                                                                | 4.495783  | -11.546280 | -13.864835 | W | 4.145706  | -10.460258 | -20.100331 |
| O                                                                | 5.415478  | -10.641673 | -18.574778 | W | 4.661559  | -13.368733 | -14.558448 |
| O                                                                | 6.159297  | -12.718685 | -15.521800 | W | 4.865013  | -14.091609 | -19.459374 |
| O                                                                | 0.095277  | -14.279873 | -18.474806 | W | 3.191081  | -15.786781 | -16.969316 |
| O                                                                | 0.697068  | -15.660862 | -20.898227 | W | 6.107006  | -11.566316 | -17.120918 |
| O                                                                | 2.048160  | -16.042316 | -18.419418 | W | 3.944795  | -9.981905  | -14.780929 |
| O                                                                | -0.647705 | -9.492389  | -14.320041 | W | 1.500076  | -14.660306 | -19.767728 |

|   |           |            |            |   |          |            |            |
|---|-----------|------------|------------|---|----------|------------|------------|
| O | 5.412652  | -14.134406 | -13.227747 | O | 6.101645 | -14.703516 | -20.467470 |
| O | 0.828215  | -9.461412  | -16.654542 | O | 7.781796 | -11.256417 | -17.259244 |
| O | 2.771602  | -13.504384 | -14.116191 | O | 2.505653 | -11.071716 | -18.407278 |
| O | 4.349263  | -8.765549  | -13.642843 | O | 2.930108 | -13.590628 | -18.102758 |
| O | 3.579782  | -8.988711  | -16.365059 | O | 1.342817 | -12.360474 | -16.530586 |
| O | 3.577369  | -8.896597  | -19.331771 | O | 3.850393 | -11.932068 | -16.391025 |
| O | 1.818752  | -15.182353 | -15.837270 | P | 2.663821 | -12.237972 | -17.360405 |
| O | -2.445277 | -13.362770 | -17.774414 | O | 1.978159 | -7.367733  | -17.867913 |
| O | 2.512426  | -10.726524 | -21.011918 |   |          |            |            |
| O | 0.436289  | -14.829858 | -13.351440 |   |          |            |            |

|                                                               |           |            |            |   |           |            |            |
|---------------------------------------------------------------|-----------|------------|------------|---|-----------|------------|------------|
| [PW <sub>11</sub> O <sub>39</sub> Fe(O)] <sup>3-</sup> 2S+1=3 |           |            |            | O | 0.973531  | -9.385216  | -19.280367 |
| Fe                                                            | 2.165707  | -8.962379  | -17.918812 | O | 5.618389  | -10.144790 | -15.898360 |
| O                                                             | 4.392031  | -14.825708 | -15.696640 | O | 1.243010  | -12.948718 | -20.408998 |
| O                                                             | 0.360039  | -12.145716 | -14.166192 | O | 5.152732  | -9.781787  | -21.258241 |
| O                                                             | 4.500704  | -12.364433 | -20.176783 | O | 3.418822  | -17.383529 | -16.464381 |
| O                                                             | 3.284417  | -14.756412 | -20.376298 | O | -0.554566 | -13.999292 | -15.840975 |
| O                                                             | -0.369073 | -11.722236 | -18.804323 | O | -0.233446 | -10.678853 | -21.387768 |
| O                                                             | 4.615828  | -15.534085 | -18.235952 | W | 0.297311  | -10.512126 | -15.351084 |
| O                                                             | 5.883895  | -13.153547 | -18.116792 | W | -0.836537 | -13.007409 | -17.423618 |
| O                                                             | 2.131893  | -10.289817 | -14.687772 | W | 0.823129  | -11.070719 | -20.110016 |
| O                                                             | -1.067724 | -11.431437 | -16.279011 | W | 0.988111  | -13.828257 | -14.648227 |
| O                                                             | 4.494220  | -11.480738 | -13.853415 | W | 4.158909  | -10.426791 | -20.035718 |
| O                                                             | 5.421485  | -10.619894 | -18.549402 | W | 4.653815  | -13.400110 | -14.571787 |
| O                                                             | 6.145105  | -12.710051 | -15.504502 | W | 4.866536  | -14.055739 | -19.458862 |
| O                                                             | 0.085688  | -14.252664 | -18.485153 | W | 3.185627  | -15.779405 | -16.977019 |
| O                                                             | 0.699009  | -15.649831 | -20.889181 | W | 6.139392  | -11.559396 | -17.104603 |
| O                                                             | 2.019516  | -16.045978 | -18.435800 | W | 3.978402  | -10.075891 | -14.901663 |
| O                                                             | -0.607110 | -9.483375  | -14.338348 | W | 1.504331  | -14.685870 | -19.744102 |
| O                                                             | 5.384184  | -14.116779 | -13.213458 | O | 6.085845  | -14.667320 | -20.473822 |

|   |           |            |            |   |          |            |            |
|---|-----------|------------|------------|---|----------|------------|------------|
| O | 0.756153  | -9.392053  | -16.715776 | O | 7.806059 | -11.265134 | -17.266058 |
| O | 2.778946  | -13.454489 | -14.146050 | O | 2.518105 | -11.118876 | -18.407884 |
| O | 4.288666  | -8.717607  | -13.920230 | O | 2.926731 | -13.615015 | -18.077988 |
| O | 3.331418  | -9.227633  | -16.708614 | O | 1.329191 | -12.357291 | -16.532477 |
| O | 3.494374  | -8.869328  | -19.282564 | O | 3.849606 | -11.962817 | -16.376711 |
| O | 1.831666  | -15.142525 | -15.852169 | P | 2.658767 | -12.265559 | -17.344027 |
| O | -2.461196 | -13.365980 | -17.773327 | O | 1.911517 | -7.381232  | -17.907078 |
| O | 2.534474  | -10.712870 | -20.973884 |   |          |            |            |
| O | 0.454872  | -14.789662 | -13.351130 |   |          |            |            |

|                                                                       |           |            |            |   |           |            |            |
|-----------------------------------------------------------------------|-----------|------------|------------|---|-----------|------------|------------|
| $[\text{PW}_{11}\text{O}_{39}\text{Fe}(\text{O})]^{3-} 2\text{S}+1=5$ |           |            |            | O | 0.924633  | -9.326622  | -19.331122 |
| Fe                                                                    | 2.200245  | -9.077235  | -17.953722 | O | 5.613379  | -10.128361 | -15.914802 |
| O                                                                     | 4.359513  | -14.780883 | -15.752813 | O | 1.280415  | -12.885640 | -20.392790 |
| O                                                                     | 0.356020  | -12.159296 | -14.155447 | O | 5.153714  | -9.866298  | -21.310286 |
| O                                                                     | 4.518322  | -12.393902 | -20.233661 | O | 3.396876  | -17.384924 | -16.463729 |
| O                                                                     | 3.320530  | -14.733006 | -20.383488 | O | -0.551209 | -14.016217 | -15.835192 |
| O                                                                     | -0.403050 | -11.708440 | -18.806138 | O | -0.295803 | -10.662923 | -21.389143 |
| O                                                                     | 4.640052  | -15.569758 | -18.243089 | W | 0.285288  | -10.531641 | -15.341052 |
| O                                                                     | 5.881654  | -13.137785 | -18.146479 | W | -0.834361 | -13.022198 | -17.414186 |
| O                                                                     | 2.119116  | -10.266736 | -14.614283 | W | 0.751292  | -10.992063 | -20.088850 |
| O                                                                     | -1.080231 | -11.458259 | -16.271932 | W | 0.987634  | -13.844276 | -14.628558 |
| O                                                                     | 4.492497  | -11.500178 | -13.911558 | W | 4.175727  | -10.555537 | -20.100167 |
| O                                                                     | 5.419306  | -10.629974 | -18.582592 | W | 4.654037  | -13.362283 | -14.595899 |
| O                                                                     | 6.158867  | -12.714356 | -15.552477 | W | 4.908681  | -14.128534 | -19.420664 |
| O                                                                     | 0.113266  | -14.229474 | -18.491059 | W | 3.153724  | -15.779211 | -16.966200 |
| O                                                                     | 0.729108  | -15.565801 | -20.927794 | W | 6.133151  | -11.525196 | -17.102736 |
| O                                                                     | 2.041270  | -16.011161 | -18.454929 | W | 3.933577  | -10.011580 | -14.894326 |
| O                                                                     | -0.636474 | -9.477154  | -14.371322 | W | 1.532563  | -14.614577 | -19.770258 |
| O                                                                     | 5.400097  | -14.106227 | -13.261681 | O | 6.135701  | -14.735200 | -20.428154 |
| O                                                                     | 0.806196  | -9.494605  | -16.719515 | O | 7.797682  | -11.222117 | -17.267237 |

|   |           |            |            |   |          |            |            |
|---|-----------|------------|------------|---|----------|------------|------------|
| O | 2.770542  | -13.480570 | -14.146690 | O | 2.506121 | -11.114637 | -18.400464 |
| O | 4.301375  | -8.726082  | -13.838819 | O | 2.946270 | -13.605740 | -18.082872 |
| O | 3.402788  | -9.028465  | -16.541920 | O | 1.333797 | -12.382538 | -16.522802 |
| O | 3.556038  | -8.938125  | -19.176831 | O | 3.843020 | -11.929605 | -16.385494 |
| O | 1.803501  | -15.184284 | -15.836246 | P | 2.656074 | -12.265883 | -17.340399 |
| O | -2.451219 | -13.407708 | -17.767882 | O | 1.955538 | -7.440753  | -17.864445 |
| O | 2.518546  | -10.641660 | -20.960601 |   |          |            |            |
| O | 0.453892  | -14.801553 | -13.328817 |   |          |            |            |

**Table S6:** Atomic spin densities (in e) and Mulliken atomic charges (in e) determined for different studied systems.

| [PW <sub>12</sub> O <sub>40</sub> ] <sup>3-</sup> |   | Charge=-3<br>Multiplicity=1 |           |
|---------------------------------------------------|---|-----------------------------|-----------|
|                                                   |   | Spin                        | Charge    |
| 1                                                 | P | 0.0000                      | 1.984646  |
| 2                                                 | W | 0.0000                      | 1.978430  |
| 3                                                 | W | -0.0000                     | 1.979209  |
| 4                                                 | W | 0.0000                      | 1.978700  |
| 5                                                 | W | 0.0000                      | 1.979674  |
| 6                                                 | W | 0.0000                      | 1.978848  |
| 7                                                 | W | -0.0000                     | 1.978185  |
| 8                                                 | W | -0.0000                     | 1.978064  |
| 9                                                 | W | -0.0000                     | 1.977634  |
| 10                                                | W | -0.0000                     | 1.979632  |
| 11                                                | W | 0.0000                      | 1.979324  |
| 12                                                | W | 0.0000                      | 1.978113  |
| 13                                                | W | -0.0000                     | 1.978438  |
| 14                                                | O | -0.0000                     | -0.739922 |
| 15                                                | O | 0.0000                      | -0.739514 |
| 16                                                | O | 0.0000                      | -0.739691 |

|    |   |         |           |
|----|---|---------|-----------|
| 17 | O | -0.0000 | -0.739804 |
| 18 | O | -0.0000 | -0.820696 |
| 19 | O | -0.0000 | -0.819869 |
| 20 | O | 0.0000  | -0.821154 |
| 21 | O | -0.0000 | -0.819593 |
| 22 | O | 0.0000  | -0.820050 |
| 23 | O | -0.0000 | -0.820654 |
| 24 | O | 0.0000  | -0.820322 |
| 25 | O | 0.0000  | -0.819794 |
| 26 | O | 0.0000  | -0.819767 |
| 27 | O | -0.0000 | -0.819545 |
| 28 | O | -0.0000 | -0.820401 |
| 29 | O | -0.0000 | -0.820737 |
| 30 | O | 0.0000  | -0.766580 |
| 31 | O | 0.0000  | -0.766176 |
| 32 | O | -0.0000 | -0.766439 |
| 33 | O | 0.0000  | -0.766095 |
| 34 | O | 0.0000  | -0.765743 |
| 35 | O | -0.0000 | -0.765751 |
| 36 | O | -0.0000 | -0.765977 |
| 37 | O | 0.0000  | -0.766355 |
| 38 | O | -0.0000 | -0.766345 |
| 39 | O | -0.0000 | -0.766268 |
| 40 | O | 0.0000  | -0.765906 |
| 41 | O | -0.0000 | -0.765743 |
| 42 | O | 0.0000  | -0.561262 |
| 43 | O | -0.0000 | -0.561301 |
| 44 | O | 0.0000  | -0.561063 |
| 45 | O | 0.0000  | -0.561048 |
| 46 | O | -0.0000 | -0.561301 |

|    |   |         |           |
|----|---|---------|-----------|
| 47 | O | -0.0000 | -0.561085 |
| 48 | O | -0.0000 | -0.561120 |
| 49 | O | -0.0000 | -0.561168 |
| 50 | O | 0.0000  | -0.561159 |
| 51 | O | 0.0000  | -0.561221 |
| 52 | O | -0.0000 | -0.561078 |
| 53 | O | -0.0000 | -0.561200 |

| [PW <sub>11</sub> O <sub>39</sub> ] <sup>7-</sup> |   | Charge=-7<br>Multiplicity=1 |           |
|---------------------------------------------------|---|-----------------------------|-----------|
|                                                   |   | Spin                        | Charge    |
| 1                                                 | P | 0.0000                      | 1.873288  |
| 2                                                 | W | -0.0000                     | 1.802748  |
| 3                                                 | W | 0.0000                      | 1.906146  |
| 4                                                 | W | -0.0000                     | 1.730760  |
| 5                                                 | W | 0.0000                      | 1.671733  |
| 6                                                 | W | 0.0000                      | 1.923806  |
| 7                                                 | W | 0.0000                      | 1.825270  |
| 8                                                 | W | -0.0000                     | 1.805034  |
| 9                                                 | W | 0.0000                      | 1.723688  |
| 10                                                | W | 0.0000                      | 1.665137  |
| 11                                                | W | 0.0000                      | 1.805309  |
| 12                                                | W | -0.0000                     | 1.912639  |
| 13                                                | O | -0.0000                     | -0.738438 |
| 14                                                | O | 0.0000                      | -0.727288 |
| 15                                                | O | -0.0000                     | -0.728109 |
| 16                                                | O | 0.0000                      | -0.727854 |
| 17                                                | O | 0.0000                      | -0.824791 |
| 18                                                | O | 0.0000                      | -0.823510 |
| 19                                                | O | -0.0000                     | -0.635602 |
| 20                                                | O | -0.0000                     | -0.810012 |



|    |   |         |           |
|----|---|---------|-----------|
| 21 | O | -0.0000 | -0.837832 |
| 22 | O | -0.0000 | -0.693660 |
| 23 | O | 0.0000  | -0.870762 |
| 24 | O | -0.0000 | -0.694365 |
| 25 | O | 0.0000  | -0.617470 |
| 26 | O | 0.0000  | -0.776194 |
| 27 | O | 0.0000  | -0.823026 |
| 28 | O | -0.0000 | -0.822522 |
| 29 | O | 0.0000  | -0.779498 |
| 30 | O | -0.0000 | -0.783669 |
| 31 | O | 0.0000  | -0.785965 |
| 32 | O | -0.0000 | -0.616427 |
| 33 | O | 0.0000  | -0.784514 |
| 34 | O | -0.0000 | -0.723258 |
| 35 | O | -0.0000 | -0.819970 |
| 36 | O | -0.0000 | -0.708783 |
| 37 | O | 0.0000  | -0.794659 |
| 38 | O | -0.0000 | -0.616314 |
| 39 | O | 0.0000  | -0.783093 |
| 40 | O | -0.0000 | -0.804727 |
| 41 | O | 0.0000  | -0.690975 |
| 42 | O | -0.0000 | -0.679593 |
| 43 | O | -0.0000 | -0.673286 |
| 44 | O | 0.0000  | -0.686809 |
| 45 | O | 0.0000  | -0.664242 |
| 46 | O | -0.0000 | -0.666141 |
| 47 | O | 0.0000  | -0.687140 |
| 48 | O | 0.0000  | -0.672833 |
| 49 | O | 0.0000  | -0.691710 |
| 50 | O | 0.0000  | -0.689904 |

|                                                                          |    | 51                          |           | O                           | -0.0000   | -0.690610                   |           |
|--------------------------------------------------------------------------|----|-----------------------------|-----------|-----------------------------|-----------|-----------------------------|-----------|
| [PW <sub>11</sub> O <sub>39</sub> {Fe <sup>n+</sup> }] <sup>(7-n)-</sup> |    | Charge=-4<br>Multiplicity=2 |           | Charge=-4<br>Multiplicity=4 |           | Charge=-4<br>Multiplicity=6 |           |
|                                                                          |    | Spin                        | Charge    | Spin                        | Charge    | Spin                        | Charge    |
| 1                                                                        | Fe | 0.906992                    | 0.847686  | 2.780808                    | 0.873961  | 3.979211                    | 0.955738  |
| 2                                                                        | O  | -0.000288                   | -0.820433 | -0.000209                   | -0.822472 | 0.000233                    | -0.820996 |
| 3                                                                        | O  | 0.000351                    | -0.770848 | -0.001796                   | -0.769048 | 0.007685                    | -0.769424 |
| 4                                                                        | O  | 0.000655                    | -0.818934 | -0.001201                   | -0.812421 | 0.003963                    | -0.818833 |
| 5                                                                        | O  | -0.000047                   | -0.775485 | -0.000103                   | -0.777107 | 0.000161                    | -0.774516 |
| 6                                                                        | O  | -0.000325                   | -0.815449 | -0.000122                   | -0.823689 | 0.000090                    | -0.826895 |
| 7                                                                        | O  | -0.000242                   | -0.775123 | 0.000231                    | -0.772995 | 0.000982                    | -0.775686 |
| 8                                                                        | O  | 0.001428                    | -0.824049 | 0.001117                    | -0.822316 | 0.000710                    | -0.819158 |
| 9                                                                        | O  | 0.020784                    | -0.816653 | 0.028582                    | -0.816531 | 0.032376                    | -0.815214 |
| 10                                                                       | O  | 0.000241                    | -0.775511 | 0.000642                    | -0.778617 | 0.005113                    | -0.776549 |
| 11                                                                       | O  | -0.000181                   | -0.766258 | -0.002887                   | -0.767965 | 0.008251                    | -0.778388 |
| 12                                                                       | O  | 0.001852                    | -0.824025 | -0.000426                   | -0.825477 | 0.001439                    | -0.818508 |
| 13                                                                       | O  | 0.001260                    | -0.773274 | 0.001288                    | -0.775195 | 0.001698                    | -0.772065 |
| 14                                                                       | O  | 0.001038                    | -0.821451 | 0.001053                    | -0.822784 | 0.000404                    | -0.817456 |
| 15                                                                       | O  | 0.000077                    | -0.598325 | -0.000103                   | -0.597793 | -0.000165                   | -0.599232 |
| 16                                                                       | O  | -0.000219                   | -0.776006 | 0.000269                    | -0.773795 | 0.000768                    | -0.769600 |
| 17                                                                       | O  | 0.007943                    | -0.608258 | 0.016522                    | -0.603001 | 0.027126                    | -0.603314 |
| 18                                                                       | O  | 0.000114                    | -0.597412 | -0.000206                   | -0.597167 | 0.000500                    | -0.597204 |
| 19                                                                       | O  | 0.035416                    | -0.715898 | 0.066826                    | -0.742277 | 0.187850                    | -0.742966 |
| 20                                                                       | O  | -0.000050                   | -0.820711 | 0.000010                    | -0.824641 | 0.000055                    | -0.818604 |
| 21                                                                       | O  | 0.006302                    | -0.608357 | 0.002114                    | -0.606217 | 0.029077                    | -0.603414 |
| 22                                                                       | O  | 0.028470                    | -0.710797 | 0.016962                    | -0.732368 | 0.254646                    | -0.757646 |
| 23                                                                       | O  | 0.009110                    | -0.678623 | 0.028455                    | -0.691946 | 0.167084                    | -0.707688 |
| 24                                                                       | O  | -0.000298                   | -0.825569 | -0.000058                   | -0.823018 | 0.000292                    | -0.822291 |
| 25                                                                       | O  | -0.000288                   | -0.596134 | -0.000201                   | -0.595857 | -0.000034                   | -0.593909 |
| 26                                                                       | O  | 0.029867                    | -0.778251 | 0.022476                    | -0.778825 | 0.020093                    | -0.780643 |
| 27                                                                       | O  | 0.000165                    | -0.596669 | -0.000006                   | -0.596802 | 0.000703                    | -0.597635 |

|    |   |           |           |           |           |           |           |
|----|---|-----------|-----------|-----------|-----------|-----------|-----------|
| 28 | O | 0.012017  | -0.680531 | -0.014290 | -0.681089 | 0.131191  | -0.692066 |
| 29 | O | 0.000902  | -0.779306 | 0.000618  | -0.779073 | 0.007896  | -0.771252 |
| 30 | O | 0.001199  | -0.826425 | -0.000951 | -0.814756 | 0.003669  | -0.798833 |
| 31 | O | -0.011066 | -0.602073 | 0.001242  | -0.598645 | 0.021226  | -0.599884 |
| 32 | O | -0.000208 | -0.597977 | 0.000629  | -0.598473 | 0.000936  | -0.598230 |
| 33 | O | 0.000969  | -0.773444 | 0.000984  | -0.775459 | 0.000917  | -0.771111 |
| 34 | O | -0.011159 | -0.601401 | -0.007793 | -0.600341 | 0.018959  | -0.601494 |
| 35 | W | -0.001496 | 1.916754  | -0.001045 | 1.939753  | -0.009670 | 1.930637  |
| 36 | W | 0.003207  | 1.951565  | 0.001864  | 1.957514  | 0.000275  | 1.945509  |
| 37 | W | -0.006025 | 1.954936  | -0.009981 | 1.944350  | -0.014175 | 1.928827  |
| 38 | W | -0.000016 | 1.964741  | 0.000173  | 1.966052  | 0.000446  | 1.957088  |
| 39 | W | -0.005455 | 1.949796  | -0.005125 | 1.946305  | -0.013937 | 1.946789  |
| 40 | W | 0.000085  | 1.960159  | 0.000008  | 1.964644  | 0.000171  | 1.963197  |
| 41 | W | 0.000187  | 1.962349  | -0.000195 | 1.958965  | 0.000676  | 1.955620  |
| 42 | W | 0.001373  | 1.961781  | 0.001663  | 1.957303  | 0.002184  | 1.960427  |
| 43 | W | 0.001801  | 1.957324  | 0.001980  | 1.957929  | 0.000576  | 1.946264  |
| 44 | W | -0.000636 | 1.913681  | -0.004148 | 1.935832  | -0.007904 | 1.940963  |
| 45 | W | -0.000002 | 1.962833  | -0.000827 | 1.958604  | 0.000654  | 1.953141  |
| 46 | O | 0.000086  | -0.598099 | -0.000067 | -0.597653 | -0.000232 | -0.598653 |
| 47 | O | -0.000249 | -0.594771 | -0.000198 | -0.595946 | 0.000053  | -0.594887 |
| 48 | O | -0.042331 | -0.767619 | 0.071981  | -0.763527 | 0.118246  | -0.772293 |
| 49 | O | -0.001596 | -0.727267 | 0.005561  | -0.736684 | 0.010036  | -0.730154 |
| 50 | O | 0.000371  | -0.727219 | -0.000037 | -0.731786 | 0.001626  | -0.728137 |
| 51 | O | 0.000449  | -0.728083 | -0.000248 | -0.731719 | 0.001462  | -0.726711 |
| 52 | P | 0.007467  | 1.989112  | -0.001837 | 1.994260  | -0.005591 | 1.977336  |

| [PW <sub>11</sub> O <sub>39</sub> {Fe <sup>n+</sup> }] <sup>(7-n)-</sup> |    | Charge=-5<br>Multiplicity=1 |           | Charge=-5<br>Multiplicity=3 |           | Charge=-5<br>Multiplicity=5 |           |
|--------------------------------------------------------------------------|----|-----------------------------|-----------|-----------------------------|-----------|-----------------------------|-----------|
|                                                                          |    | Spin                        | Charge    | Spin                        | Charge    | Spin                        | Charge    |
| 1                                                                        | Fe | 0.0000                      | 0.666359  | 2.197634                    | 0.689805  | 3.705000                    | 0.732828  |
| 2                                                                        | O  | 0.0000                      | -0.821017 | 0.000513                    | -0.820621 | 0.000014                    | -0.822180 |

|    |   |        |           |           |           |           |           |
|----|---|--------|-----------|-----------|-----------|-----------|-----------|
| 3  | O | 0.0000 | -0.762783 | -0.006981 | -0.758828 | 0.005338  | -0.767729 |
| 4  | O | 0.0000 | -0.806839 | -0.004673 | -0.801446 | 0.001718  | -0.783225 |
| 5  | O | 0.0000 | -0.782317 | 0.000383  | -0.781554 | -0.000178 | -0.778309 |
| 6  | O | 0.0000 | -0.823727 | 0.003707  | -0.825379 | -0.000126 | -0.821873 |
| 7  | O | 0.0000 | -0.779252 | 0.000448  | -0.776872 | 0.000142  | -0.775621 |
| 8  | O | 0.0000 | -0.820772 | -0.001853 | -0.819750 | 0.000349  | -0.810150 |
| 9  | O | 0.0000 | -0.816459 | -0.004992 | -0.817677 | 0.010806  | -0.817457 |
| 10 | O | 0.0000 | -0.781395 | 0.004471  | -0.783607 | 0.001524  | -0.777882 |
| 11 | O | 0.0000 | -0.762969 | -0.007399 | -0.763879 | 0.006778  | -0.771552 |
| 12 | O | 0.0000 | -0.824001 | 0.003012  | -0.822477 | -0.000776 | -0.828337 |
| 13 | O | 0.0000 | -0.780045 | -0.003060 | -0.779753 | 0.001414  | -0.778897 |
| 14 | O | 0.0000 | -0.820889 | -0.001718 | -0.820354 | 0.000442  | -0.814743 |
| 15 | O | 0.0000 | -0.631832 | 0.000030  | -0.631036 | -0.000113 | -0.631774 |
| 16 | O | 0.0000 | -0.779511 | 0.000623  | -0.777035 | 0.000123  | -0.779310 |
| 17 | O | 0.0000 | -0.646306 | 0.009386  | -0.642179 | 0.008755  | -0.638327 |
| 18 | O | 0.0000 | -0.629487 | -0.000215 | -0.629058 | 0.000492  | -0.628888 |
| 19 | O | 0.0000 | -0.696708 | -0.000333 | -0.710654 | 0.054379  | -0.744060 |
| 20 | O | 0.0000 | -0.824433 | 0.000719  | -0.824857 | -0.000085 | -0.826177 |
| 21 | O | 0.0000 | -0.646400 | 0.011172  | -0.639957 | 0.004043  | -0.639477 |
| 22 | O | 0.0000 | -0.696300 | 0.002932  | -0.717961 | 0.047781  | -0.742126 |
| 23 | O | 0.0000 | -0.668555 | -0.010305 | -0.682565 | 0.033196  | -0.676879 |
| 24 | O | 0.0000 | -0.820935 | 0.000554  | -0.818562 | -0.000024 | -0.823526 |
| 25 | O | 0.0000 | -0.625671 | 0.002288  | -0.625586 | 0.000105  | -0.623211 |
| 26 | O | 0.0000 | -0.792789 | -0.006283 | -0.788133 | 0.005931  | -0.792267 |
| 27 | O | 0.0000 | -0.629559 | -0.000265 | -0.629447 | 0.000279  | -0.629019 |
| 28 | O | 0.0000 | -0.668600 | -0.008196 | -0.685467 | 0.036437  | -0.688752 |
| 29 | O | 0.0000 | -0.781265 | 0.004632  | -0.783834 | 0.003911  | -0.782365 |
| 30 | O | 0.0000 | -0.807133 | -0.004970 | -0.799767 | 0.001788  | -0.800401 |
| 31 | O | 0.0000 | -0.637261 | -0.000519 | -0.635699 | 0.008713  | -0.636041 |
| 32 | O | 0.0000 | -0.631670 | 0.000975  | -0.631818 | 0.000338  | -0.630839 |

|    |   |        |           |           |           |           |           |
|----|---|--------|-----------|-----------|-----------|-----------|-----------|
| 33 | O | 0.0000 | -0.780109 | -0.003446 | -0.779562 | 0.000550  | -0.779868 |
| 34 | O | 0.0000 | -0.637184 | -0.000381 | -0.633828 | 0.009074  | -0.635791 |
| 35 | W | 0.0000 | 1.842833  | -0.044976 | 1.860533  | 0.007326  | 1.867195  |
| 36 | W | 0.0000 | 1.913043  | -0.029490 | 1.916101  | -0.001361 | 1.913187  |
| 37 | W | 0.0000 | 1.881705  | -0.033065 | 1.875973  | -0.003447 | 1.874004  |
| 38 | W | 0.0000 | 1.940090  | -0.000420 | 1.938604  | 0.000011  | 1.948552  |
| 39 | W | 0.0000 | 1.882050  | -0.033861 | 1.879143  | -0.002097 | 1.855116  |
| 40 | W | 0.0000 | 1.940565  | -0.000060 | 1.941399  | -0.000024 | 1.947070  |
| 41 | W | 0.0000 | 1.932714  | -0.001069 | 1.929559  | 0.000638  | 1.923539  |
| 42 | W | 0.0000 | 1.941336  | -0.005386 | 1.933156  | 0.001613  | 1.945162  |
| 43 | W | 0.0000 | 1.913589  | -0.029405 | 1.915085  | 0.000679  | 1.912701  |
| 44 | W | 0.0000 | 1.842064  | -0.045773 | 1.864516  | 0.008836  | 1.880984  |
| 45 | W | 0.0000 | 1.933603  | -0.001473 | 1.928981  | 0.000774  | 1.924413  |
| 46 | O | 0.0000 | -0.631889 | -0.000033 | -0.631099 | -0.000100 | -0.631923 |
| 47 | O | 0.0000 | -0.625659 | 0.002270  | -0.626092 | -0.000052 | -0.623433 |
| 48 | O | 0.0000 | -0.756771 | 0.042382  | -0.756998 | 0.040216  | -0.766703 |
| 49 | O | 0.0000 | -0.728409 | 0.003208  | -0.737521 | 0.003042  | -0.734487 |
| 50 | O | 0.0000 | -0.729330 | 0.000120  | -0.732753 | 0.000161  | -0.726462 |
| 51 | O | 0.0000 | -0.729486 | 0.000142  | -0.733613 | -0.000309 | -0.729546 |
| 52 | P | 0.0000 | 1.985769  | -0.000999 | 1.984424  | -0.004024 | 1.964856  |

| [PW <sub>11</sub> O <sub>39</sub> Fe <sup>+n</sup> (H <sub>2</sub> O)] <sup>-(7-n)</sup> |    | Charge=-4<br>Multiplicity=2 |           | Charge=-4<br>Multiplicity=4 |           | Charge=-4<br>Multiplicity=6 |           |
|------------------------------------------------------------------------------------------|----|-----------------------------|-----------|-----------------------------|-----------|-----------------------------|-----------|
|                                                                                          |    | Spin                        | Charge    | Spin                        | Charge    | Spin                        | Charge    |
| 1                                                                                        | Fe | 0.924499                    | 0.661910  | 2.788609                    | 0.855082  | 4.396534                    | 0.928167  |
| 2                                                                                        | O  | -0.000161                   | -0.815451 | -0.000116                   | -0.820984 | 0.000063                    | -0.822076 |
| 3                                                                                        | O  | 0.000261                    | -0.774359 | -0.001877                   | -0.772919 | 0.000851                    | -0.771280 |
| 4                                                                                        | O  | -0.000059                   | -0.812757 | -0.001232                   | -0.807004 | 0.000766                    | -0.817414 |
| 5                                                                                        | O  | -0.000217                   | -0.773525 | -0.000095                   | -0.773546 | 0.000016                    | -0.774517 |
| 6                                                                                        | O  | -0.000635                   | -0.812974 | -0.001159                   | -0.820979 | 0.000492                    | -0.826700 |
| 7                                                                                        | O  | -0.000266                   | -0.772843 | 0.000222                    | -0.770440 | 0.000028                    | -0.775290 |

|    |   |           |           |           |           |           |           |
|----|---|-----------|-----------|-----------|-----------|-----------|-----------|
| 8  | O | 0.001317  | -0.823021 | 0.001166  | -0.818069 | -0.000062 | -0.819692 |
| 9  | O | 0.022416  | -0.816673 | 0.026903  | -0.814194 | 0.000470  | -0.817131 |
| 10 | O | -0.000097 | -0.772463 | -0.001523 | -0.775438 | 0.000580  | -0.776608 |
| 11 | O | -0.000502 | -0.759550 | -0.002699 | -0.768181 | 0.000634  | -0.778111 |
| 12 | O | 0.002271  | -0.821675 | 0.000709  | -0.827407 | 0.000139  | -0.819915 |
| 13 | O | 0.001162  | -0.771143 | 0.001290  | -0.774200 | -0.000028 | -0.771656 |
| 14 | O | 0.000758  | -0.819090 | 0.000802  | -0.819823 | 0.000031  | -0.818472 |
| 15 | O | -0.000059 | -0.598304 | -0.000036 | -0.594903 | -0.000009 | -0.596359 |
| 16 | O | -0.000428 | -0.774039 | 0.000308  | -0.773627 | 0.000024  | -0.770579 |
| 17 | O | -0.000532 | -0.615358 | 0.001975  | -0.603351 | -0.000366 | -0.599599 |
| 18 | O | -0.000274 | -0.598029 | -0.000127 | -0.594346 | 0.000002  | -0.594917 |
| 19 | O | 0.017863  | -0.744727 | 0.019572  | -0.760419 | -0.058598 | -0.770072 |
| 20 | O | -0.000078 | -0.818837 | 0.000001  | -0.821471 | 0.000031  | -0.818871 |
| 21 | O | -0.001656 | -0.612861 | 0.017496  | -0.598383 | -0.000464 | -0.599520 |
| 22 | O | 0.011224  | -0.691848 | 0.065328  | -0.742796 | -0.073838 | -0.757251 |
| 23 | O | 0.012191  | -0.671873 | -0.018477 | -0.676844 | -0.047640 | -0.705426 |
| 24 | O | -0.000243 | -0.825451 | -0.000098 | -0.822984 | 0.000095  | -0.823392 |
| 25 | O | -0.000272 | -0.598808 | -0.000136 | -0.592144 | -0.000014 | -0.590530 |
| 26 | O | 0.029329  | -0.774738 | 0.020944  | -0.778182 | 0.000628  | -0.780955 |
| 27 | O | 0.000033  | -0.596816 | -0.000050 | -0.594537 | 0.000000  | -0.595035 |
| 28 | O | 0.033623  | -0.721473 | 0.029613  | -0.726764 | -0.039882 | -0.723964 |
| 29 | O | 0.001037  | -0.780204 | 0.002672  | -0.776013 | 0.000386  | -0.771430 |
| 30 | O | -0.000243 | -0.827670 | -0.001017 | -0.821073 | 0.000773  | -0.802957 |
| 31 | O | -0.006322 | -0.603816 | -0.008490 | -0.597766 | -0.000043 | -0.597097 |
| 32 | O | -0.000345 | -0.598551 | 0.000625  | -0.595853 | -0.000004 | -0.595835 |
| 33 | O | 0.001064  | -0.772351 | 0.000351  | -0.774023 | 0.000061  | -0.770709 |
| 34 | O | -0.002715 | -0.602174 | 0.001622  | -0.593327 | -0.000021 | -0.596314 |
| 35 | W | -0.002868 | 1.911721  | -0.006677 | 1.923010  | -0.020936 | 1.914269  |
| 36 | W | 0.003929  | 1.949555  | 0.002948  | 1.952955  | 0.001053  | 1.953801  |
| 37 | W | -0.004908 | 1.955959  | -0.005573 | 1.937331  | -0.034168 | 1.919795  |

|    |   |           |           |           |           |           |           |
|----|---|-----------|-----------|-----------|-----------|-----------|-----------|
| 38 | W | 0.000071  | 1.963504  | 0.000148  | 1.965474  | -0.000425 | 1.959231  |
| 39 | W | -0.002068 | 1.949955  | -0.009360 | 1.943359  | -0.029450 | 1.952672  |
| 40 | W | 0.000316  | 1.954354  | 0.000192  | 1.963945  | -0.000439 | 1.966404  |
| 41 | W | -0.000170 | 1.955597  | -0.000698 | 1.956558  | -0.000217 | 1.957861  |
| 42 | W | 0.000975  | 1.959725  | 0.001562  | 1.956824  | -0.000499 | 1.964335  |
| 43 | W | 0.001689  | 1.950690  | 0.000897  | 1.956070  | 0.000521  | 1.949225  |
| 44 | W | -0.003279 | 1.907935  | -0.000391 | 1.947657  | -0.017188 | 1.951991  |
| 45 | W | -0.000395 | 1.960766  | -0.000111 | 1.958264  | -0.000379 | 1.957267  |
| 46 | O | 0.000022  | -0.598398 | -0.000078 | -0.595725 | -0.000010 | -0.596522 |
| 47 | O | -0.000197 | -0.594218 | -0.000180 | -0.593149 | 0.000004  | -0.592180 |
| 48 | O | -0.023059 | -0.742804 | 0.070904  | -0.763075 | -0.071873 | -0.772325 |
| 49 | O | -0.002618 | -0.731037 | 0.005457  | -0.737063 | -0.000296 | -0.730148 |
| 50 | O | 0.000174  | -0.730691 | -0.000319 | -0.730804 | 0.001477  | -0.728258 |
| 51 | O | -0.000005 | -0.732519 | -0.000015 | -0.733373 | 0.001617  | -0.726875 |
| 52 | P | -0.001881 | 1.998839  | -0.002445 | 1.993396  | -0.023337 | 1.976817  |
| 53 | O | -0.008116 | -0.752187 | 0.000428  | -0.885871 | 0.000673  | -0.885613 |
| 54 | H | -0.000837 | 0.488688  | -0.000019 | 0.463256  | -0.001121 | 0.463559  |
| 55 | H | -0.000721 | 0.486105  | 0.000257  | 0.467867  | -0.001376 | 0.466203  |

| [PW <sub>11</sub> O <sub>39</sub> Fe <sup>+n</sup> (H <sub>2</sub> O)] <sup>-(7-n)</sup> |    | Charge=-5<br>Multiplicity=1 |           | Charge=-5<br>Multiplicity=3 |           | Charge=-5<br>Multiplicity=5 |           |
|------------------------------------------------------------------------------------------|----|-----------------------------|-----------|-----------------------------|-----------|-----------------------------|-----------|
|                                                                                          |    | Spin                        | Charge    | Spin                        | Charge    | Spin                        | Charge    |
| 1                                                                                        | Fe | 0.0000                      | 0.641991  | 2.204576                    | 0.667702  | 3.684524                    | 0.698439  |
| 2                                                                                        | O  | 0.0000                      | -0.819221 | 0.000511                    | -0.819428 | 0.000079                    | -0.820438 |
| 3                                                                                        | O  | 0.0000                      | -0.766887 | -0.006819                   | -0.763180 | 0.005570                    | -0.774767 |
| 4                                                                                        | O  | 0.0000                      | -0.804943 | -0.004756                   | -0.798376 | 0.001863                    | -0.778141 |
| 5                                                                                        | O  | 0.0000                      | -0.781363 | 0.000387                    | -0.780684 | -0.000197                   | -0.774305 |
| 6                                                                                        | O  | 0.0000                      | -0.821237 | 0.003044                    | -0.825110 | -0.001068                   | -0.817594 |
| 7                                                                                        | O  | 0.0000                      | -0.778055 | 0.000400                    | -0.775640 | 0.000130                    | -0.772754 |
| 8                                                                                        | O  | 0.0000                      | -0.821236 | -0.002477                   | -0.819259 | 0.000316                    | -0.807127 |
| 9                                                                                        | O  | 0.0000                      | -0.817283 | -0.005437                   | -0.818436 | 0.006855                    | -0.815000 |

|    |   |        |           |           |           |           |           |
|----|---|--------|-----------|-----------|-----------|-----------|-----------|
| 10 | O | 0.0000 | -0.779659 | 0.003711  | -0.782008 | 0.000129  | -0.773977 |
| 11 | O | 0.0000 | -0.761537 | -0.007591 | -0.762689 | 0.006700  | -0.770313 |
| 12 | O | 0.0000 | -0.826227 | 0.003648  | -0.824535 | -0.000897 | -0.830864 |
| 13 | O | 0.0000 | -0.779610 | -0.003513 | -0.779555 | 0.001304  | -0.777373 |
| 14 | O | 0.0000 | -0.820260 | -0.001066 | -0.820350 | 0.000418  | -0.810112 |
| 15 | O | 0.0000 | -0.628950 | 0.000056  | -0.628050 | -0.000148 | -0.628288 |
| 16 | O | 0.0000 | -0.780023 | 0.000699  | -0.777665 | 0.000202  | -0.780099 |
| 17 | O | 0.0000 | -0.642086 | 0.008951  | -0.636971 | 0.009803  | -0.633357 |
| 18 | O | 0.0000 | -0.627227 | -0.000222 | -0.626721 | 0.000598  | -0.626180 |
| 19 | O | 0.0000 | -0.727869 | -0.002520 | -0.742424 | 0.048871  | -0.777448 |
| 20 | O | 0.0000 | -0.823965 | 0.000733  | -0.825508 | -0.000047 | -0.822439 |
| 21 | O | 0.0000 | -0.642519 | 0.010869  | -0.636428 | 0.010924  | -0.633803 |
| 22 | O | 0.0000 | -0.695702 | 0.003478  | -0.717336 | 0.053884  | -0.751265 |
| 23 | O | 0.0000 | -0.667115 | -0.009420 | -0.681044 | 0.028355  | -0.662262 |
| 24 | O | 0.0000 | -0.822748 | 0.000594  | -0.820266 | -0.000105 | -0.823566 |
| 25 | O | 0.0000 | -0.622135 | 0.002138  | -0.621754 | -0.000065 | -0.618835 |
| 26 | O | 0.0000 | -0.792008 | -0.006743 | -0.788472 | 0.005729  | -0.790992 |
| 27 | O | 0.0000 | -0.626775 | -0.000274 | -0.626608 | 0.000330  | -0.625877 |
| 28 | O | 0.0000 | -0.705815 | -0.010778 | -0.719886 | 0.042480  | -0.732617 |
| 29 | O | 0.0000 | -0.782227 | 0.005345  | -0.784048 | 0.004212  | -0.779363 |
| 30 | O | 0.0000 | -0.813622 | -0.004918 | -0.807442 | 0.002319  | -0.812642 |
| 31 | O | 0.0000 | -0.634450 | -0.000683 | -0.632745 | 0.007513  | -0.634724 |
| 32 | O | 0.0000 | -0.629241 | 0.000992  | -0.629431 | 0.000318  | -0.628009 |
| 33 | O | 0.0000 | -0.779252 | -0.002897 | -0.779582 | 0.000745  | -0.777798 |
| 34 | O | 0.0000 | -0.630135 | -0.000266 | -0.627674 | 0.007894  | -0.628283 |
| 35 | W | 0.0000 | 1.830893  | -0.041712 | 1.848607  | 0.011033  | 1.872550  |
| 36 | W | 0.0000 | 1.917333  | -0.027561 | 1.923929  | 0.001221  | 1.901948  |
| 37 | W | 0.0000 | 1.875412  | -0.029659 | 1.870823  | -0.000316 | 1.875822  |
| 38 | W | 0.0000 | 1.943269  | -0.000426 | 1.941939  | -0.000340 | 1.949439  |
| 39 | W | 0.0000 | 1.888363  | -0.036622 | 1.884515  | -0.003645 | 1.853632  |



|    |   |        |           |           |           |           |           |
|----|---|--------|-----------|-----------|-----------|-----------|-----------|
| 40 | W | 0.0000 | 1.941121  | -0.000080 | 1.943103  | 0.000012  | 1.944980  |
| 41 | W | 0.0000 | 1.934056  | -0.000917 | 1.930622  | 0.000636  | 1.921545  |
| 42 | W | 0.0000 | 1.943236  | -0.005726 | 1.935231  | 0.001722  | 1.943925  |
| 43 | W | 0.0000 | 1.915484  | -0.032430 | 1.915545  | 0.000551  | 1.913109  |
| 44 | W | 0.0000 | 1.852326  | -0.049695 | 1.872239  | 0.019829  | 1.897035  |
| 45 | W | 0.0000 | 1.937256  | -0.001525 | 1.933379  | 0.000636  | 1.926939  |
| 46 | O | 0.0000 | -0.629456 | -0.000035 | -0.628887 | -0.000055 | -0.630161 |
| 47 | O | 0.0000 | -0.622558 | 0.002531  | -0.623223 | -0.000090 | -0.620499 |
| 48 | O | 0.0000 | -0.757042 | 0.042272  | -0.757433 | 0.043155  | -0.765811 |
| 49 | O | 0.0000 | -0.728537 | 0.003165  | -0.737602 | 0.002991  | -0.734858 |
| 50 | O | 0.0000 | -0.729441 | 0.000121  | -0.732781 | 0.000570  | -0.725728 |
| 51 | O | 0.0000 | -0.729917 | 0.000156  | -0.734078 | 0.000617  | -0.730946 |
| 52 | P | 0.0000 | 1.985109  | -0.001278 | 1.984404  | -0.007441 | 1.967348  |
| 53 | O | 0.0000 | -0.901897 | 0.000274  | -0.900231 | -0.000220 | -0.906691 |
| 54 | H | 0.0000 | 0.468710  | -0.000428 | 0.468781  | -0.000380 | 0.468737  |
| 55 | H | 0.0000 | 0.475670  | -0.000177 | 0.472722  | -0.000022 | 0.469855  |

|    |    | [PW <sub>11</sub> O <sub>39</sub> Fe <sup>+4</sup> (H <sub>2</sub> O)] <sup>-3</sup> |           | [PW <sub>11</sub> O <sub>39</sub> Fe <sup>+4</sup> (OH)] <sup>-4</sup> |           | [PW <sub>11</sub> O <sub>39</sub> Fe <sup>+4</sup> (O)] <sup>-5</sup> |           |
|----|----|--------------------------------------------------------------------------------------|-----------|------------------------------------------------------------------------|-----------|-----------------------------------------------------------------------|-----------|
|    |    | Charge=-3<br>Multiplicity=3                                                          |           | Charge=-4<br>Multiplicity=3                                            |           | Charge=-5<br>Multiplicity=3                                           |           |
|    |    | Spin                                                                                 | Charge    | Spin                                                                   | Charge    | Spin                                                                  | Charge    |
| 1  | Fe | 1.594526                                                                             | 0.824400  | 1.712700                                                               | 0.866888  | 3.072304                                                              | 0.864579  |
| 2  | O  | -0.000242                                                                            | -0.825998 | -0.000233                                                              | -0.827017 | 0.000003                                                              | -0.822341 |
| 3  | O  | -0.003249                                                                            | -0.757088 | -0.001427                                                              | -0.763799 | 0.005836                                                              | -0.765162 |
| 4  | O  | -0.000505                                                                            | -0.820081 | -0.001423                                                              | -0.825011 | 0.002901                                                              | -0.794625 |
| 5  | O  | -0.000009                                                                            | -0.770321 | -0.000383                                                              | -0.774428 | -0.000730                                                             | -0.779264 |
| 6  | O  | 0.000175                                                                             | -0.816851 | 0.001736                                                               | -0.823539 | 0.000016                                                              | -0.818709 |
| 7  | O  | -0.000253                                                                            | -0.769156 | -0.000360                                                              | -0.773828 | -0.000114                                                             | -0.779316 |
| 8  | O  | 0.001183                                                                             | -0.823013 | 0.001142                                                               | -0.821474 | 0.001159                                                              | -0.818523 |
| 9  | O  | 0.036849                                                                             | -0.810635 | 0.029470                                                               | -0.815030 | 0.018262                                                              | -0.821640 |
| 10 | O  | 0.009536                                                                             | -0.765318 | 0.001609                                                               | -0.775975 | 0.001748                                                              | -0.776146 |

|    |   |           |           |           |           |           |           |
|----|---|-----------|-----------|-----------|-----------|-----------|-----------|
| 11 | O | -0.002145 | -0.763684 | -0.002372 | -0.764781 | 0.005856  | -0.758673 |
| 12 | O | 0.002408  | -0.823805 | 0.001557  | -0.817999 | 0.001163  | -0.825683 |
| 13 | O | -0.000475 | -0.767538 | 0.001017  | -0.774924 | 0.001231  | -0.775539 |
| 14 | O | 0.001069  | -0.822888 | 0.000990  | -0.822096 | 0.000571  | -0.818819 |
| 15 | O | 0.000026  | -0.566297 | -0.000068 | -0.596126 | -0.000167 | -0.629075 |
| 16 | O | -0.000827 | -0.773949 | -0.000374 | -0.774351 | -0.000142 | -0.782004 |
| 17 | O | 0.034270  | -0.571370 | 0.013117  | -0.603428 | 0.002069  | -0.636053 |
| 18 | O | -0.000192 | -0.564999 | -0.000201 | -0.594548 | 0.000495  | -0.627033 |
| 19 | O | 0.390904  | -0.667352 | 0.062899  | -0.691548 | 0.076055  | -0.695852 |
| 20 | O | -0.000007 | -0.820729 | -0.000143 | -0.821120 | -0.000253 | -0.823383 |
| 21 | O | -0.001923 | -0.583148 | -0.002225 | -0.608851 | 0.002146  | -0.635423 |
| 22 | O | -0.000390 | -0.732202 | 0.006498  | -0.709238 | 0.071281  | -0.689892 |
| 23 | O | 0.032096  | -0.695804 | 0.097714  | -0.666052 | 0.084550  | -0.678881 |
| 24 | O | 0.000289  | -0.813477 | -0.000254 | -0.820238 | -0.000106 | -0.827407 |
| 25 | O | 0.000286  | -0.564793 | -0.000182 | -0.593073 | -0.000060 | -0.621340 |
| 26 | O | 0.021834  | -0.776994 | 0.043242  | -0.771796 | 0.020056  | -0.784422 |
| 27 | O | 0.000319  | -0.565547 | 0.000099  | -0.595249 | 0.000369  | -0.626228 |
| 28 | O | -0.021702 | -0.656911 | 0.006243  | -0.653165 | 0.089756  | -0.680461 |
| 29 | O | -0.002191 | -0.772492 | -0.000994 | -0.775394 | 0.002303  | -0.783595 |
| 30 | O | -0.001072 | -0.826055 | -0.002184 | -0.810026 | 0.003331  | -0.806585 |
| 31 | O | -0.000505 | -0.568975 | 0.003713  | -0.594140 | 0.010108  | -0.627343 |
| 32 | O | -0.000852 | -0.564833 | -0.000415 | -0.595806 | -0.000416 | -0.627777 |
| 33 | O | 0.001048  | -0.767387 | 0.001787  | -0.773130 | 0.000902  | -0.778342 |
| 34 | O | -0.010850 | -0.570806 | -0.007630 | -0.596184 | 0.009679  | -0.627009 |
| 35 | W | -0.020640 | 1.959814  | -0.012659 | 1.937771  | -0.001635 | 1.881166  |
| 36 | W | 0.002686  | 1.978119  | 0.001425  | 1.958131  | 0.000826  | 1.922440  |
| 37 | W | -0.002464 | 1.996914  | -0.010434 | 1.945708  | -0.010141 | 1.898952  |
| 38 | W | 0.000944  | 1.967686  | -0.000073 | 1.963165  | 0.000524  | 1.952672  |
| 39 | W | -0.004324 | 1.989505  | -0.015879 | 1.974463  | -0.009378 | 1.889303  |
| 40 | W | 0.000567  | 1.976689  | 0.000345  | 1.966913  | 0.000580  | 1.944398  |

|    |   |           |           |           |           |           |           |
|----|---|-----------|-----------|-----------|-----------|-----------|-----------|
| 41 | W | 0.000215  | 1.982521  | -0.000051 | 1.964746  | 0.000754  | 1.938371  |
| 42 | W | 0.001215  | 1.985363  | 0.001194  | 1.963668  | 0.001648  | 1.957710  |
| 43 | W | 0.001059  | 1.977084  | 0.003176  | 1.958853  | 0.000253  | 1.925730  |
| 44 | W | -0.009520 | 1.942731  | -0.009115 | 1.907354  | -0.002733 | 1.879113  |
| 45 | W | 0.000351  | 1.979699  | 0.000120  | 1.959983  | 0.000700  | 1.940288  |
| 46 | O | 0.000058  | -0.565474 | -0.000042 | -0.595887 | -0.000143 | -0.628965 |
| 47 | O | -0.000163 | -0.565843 | -0.000221 | -0.594292 | -0.000072 | -0.620421 |
| 48 | O | -0.032818 | -0.740547 | -0.012093 | -0.735207 | -0.014603 | -0.732885 |
| 49 | O | -0.006680 | -0.722770 | -0.002177 | -0.730835 | -0.002454 | -0.728936 |
| 50 | O | 0.005015  | -0.726178 | 0.000841  | -0.733520 | 0.000347  | -0.733474 |
| 51 | O | 0.000205  | -0.727193 | -0.000038 | -0.731757 | 0.000339  | -0.734165 |
| 52 | P | -0.001025 | 1.987708  | -0.003022 | 1.990663  | -0.001934 | 1.966850  |
| 53 | O | -0.014931 | -0.731814 | 0.098916  | -0.641052 | 0.554961  | -0.440183 |
| 54 | H | 0.000957  | 0.495642  | -0.004876 | 0.427608  | -         | -         |
| 55 | H | -0.000135 | 0.496441  | -         | -         | -         | -         |

|    |    | [PW <sub>11</sub> O <sub>39</sub> Fe <sup>+5</sup> (O)] <sup>-4</sup> |           | [PW <sub>11</sub> O <sub>39</sub> Fe <sup>+6</sup> (O)] <sup>-3</sup> |           |
|----|----|-----------------------------------------------------------------------|-----------|-----------------------------------------------------------------------|-----------|
|    |    | Charge=-4<br>Multiplicity=4                                           |           | Charge=-3<br>Multiplicity=3                                           |           |
|    |    | Spin                                                                  | Charge    | Spin                                                                  | Charge    |
| 1  | Fe | 1.985691                                                              | 0.960527  | 1.332332                                                              | 1.108209  |
| 2  | O  | -0.000189                                                             | -0.818415 | -0.000753                                                             | -0.802579 |
| 3  | O  | -0.001929                                                             | -0.760071 | 0.000416                                                              | -0.748490 |
| 4  | O  | -0.003827                                                             | -0.817999 | -0.003269                                                             | -0.814634 |
| 5  | O  | -0.000448                                                             | -0.774153 | 0.000282                                                              | -0.768965 |
| 6  | O  | 0.001091                                                              | -0.821785 | 0.003681                                                              | -0.819883 |
| 7  | O  | -0.000426                                                             | -0.775879 | -0.000201                                                             | -0.772433 |
| 8  | O  | 0.001174                                                              | -0.824021 | 0.001204                                                              | -0.822075 |
| 9  | O  | 0.032430                                                              | -0.817284 | 0.058968                                                              | -0.812384 |
| 10 | O  | -0.001272                                                             | -0.774491 | -0.004877                                                             | -0.771326 |
| 11 | O  | -0.002505                                                             | -0.755607 | -0.003298                                                             | -0.736558 |

|    |   |           |           |           |           |
|----|---|-----------|-----------|-----------|-----------|
| 12 | O | 0.003176  | -0.821607 | 0.001350  | -0.817079 |
| 13 | O | 0.001578  | -0.773576 | -0.004457 | -0.771949 |
| 14 | O | 0.000663  | -0.824043 | 0.001318  | -0.823731 |
| 15 | O | -0.000143 | -0.595289 | -0.000110 | -0.562080 |
| 16 | O | -0.000488 | -0.774088 | -0.001051 | -0.768470 |
| 17 | O | 0.002920  | -0.602384 | 0.008499  | -0.567384 |
| 18 | O | -0.000123 | -0.594535 | -0.000136 | -0.563657 |
| 19 | O | 0.041682  | -0.683624 | 0.053888  | -0.679966 |
| 20 | O | -0.000147 | -0.826034 | -0.001404 | -0.826964 |
| 21 | O | 0.002970  | -0.601977 | -0.007192 | -0.565003 |
| 22 | O | 0.038836  | -0.679033 | 0.171397  | -0.598323 |
| 23 | O | 0.054076  | -0.660905 | 0.037020  | -0.640413 |
| 24 | O | -0.000182 | -0.824860 | -0.002302 | -0.822869 |
| 25 | O | -0.000188 | -0.593386 | -0.000080 | -0.562771 |
| 26 | O | 0.060524  | -0.768620 | 0.035483  | -0.767084 |
| 27 | O | -0.000092 | -0.593943 | 0.000129  | -0.561789 |
| 28 | O | 0.071136  | -0.661263 | -0.046421 | -0.617844 |
| 29 | O | -0.000011 | -0.777711 | -0.012975 | -0.765139 |
| 30 | O | -0.003446 | -0.822267 | -0.002305 | -0.816406 |
| 31 | O | -0.004467 | -0.593330 | 0.001560  | -0.561677 |
| 32 | O | -0.000402 | -0.595629 | -0.000330 | -0.561693 |
| 33 | O | 0.001579  | -0.776016 | -0.001735 | -0.767782 |
| 34 | O | -0.004549 | -0.592782 | -0.025821 | -0.557126 |
| 35 | W | -0.015714 | 1.925810  | -0.019302 | 1.950805  |
| 36 | W | 0.002640  | 1.963095  | 0.001178  | 1.982700  |
| 37 | W | -0.023749 | 1.961875  | 0.004735  | 1.983677  |
| 38 | W | 0.000040  | 1.968232  | 0.001116  | 1.974443  |
| 39 | W | -0.021696 | 1.954407  | -0.014667 | 1.960691  |
| 40 | W | 0.000112  | 1.962396  | 0.002173  | 1.962920  |
| 41 | W | 0.000240  | 1.967469  | 0.000906  | 1.979370  |

|    |   |           |           |           |           |
|----|---|-----------|-----------|-----------|-----------|
| 42 | W | 0.001044  | 1.961982  | 0.001253  | 1.980273  |
| 43 | W | 0.001260  | 1.961633  | 0.004910  | 1.983102  |
| 44 | W | -0.015085 | 1.922782  | -0.006391 | 1.950743  |
| 45 | W | 0.000189  | 1.968334  | 0.000612  | 1.984112  |
| 46 | O | -0.000129 | -0.594962 | -0.000191 | -0.563354 |
| 47 | O | -0.000185 | -0.592871 | 0.000233  | -0.562725 |
| 48 | O | -0.014173 | -0.734089 | -0.016483 | -0.719959 |
| 49 | O | -0.001879 | -0.733058 | -0.001586 | -0.733972 |
| 50 | O | 0.000136  | -0.733989 | -0.000266 | -0.735549 |
| 51 | O | 0.000146  | -0.734532 | -0.001353 | -0.734080 |
| 52 | P | -0.002627 | 1.987260  | -0.001341 | 1.976980  |
| 53 | O | 0.814739  | -0.365696 | 0.455651  | -0.311861 |

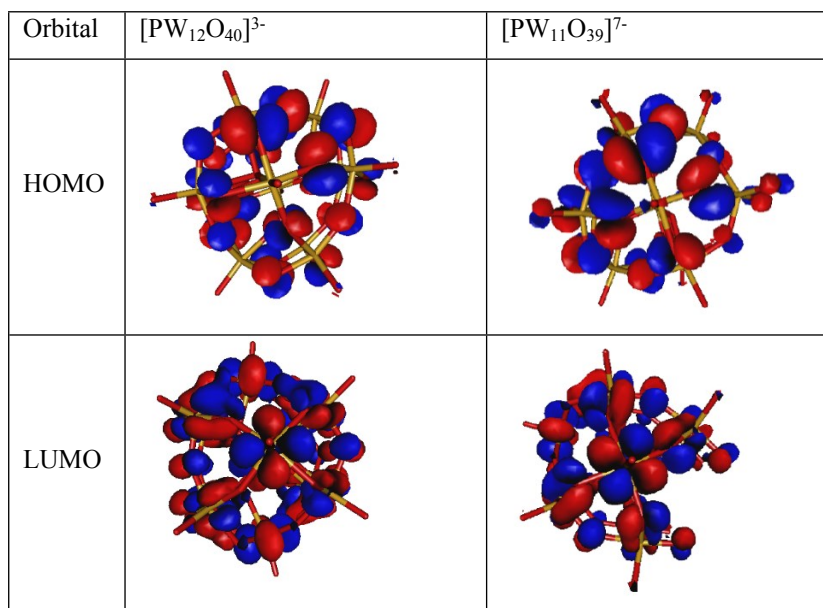

**Figure S1.** HOMOs and LUMOs of [PW<sub>12</sub>O<sub>40</sub>]<sup>3-</sup> and [PW<sub>11</sub>O<sub>39</sub>]<sup>7-</sup> calculated at the UOPBE/6-31G(d) level (LANL2DZ basis set on the metal atom).

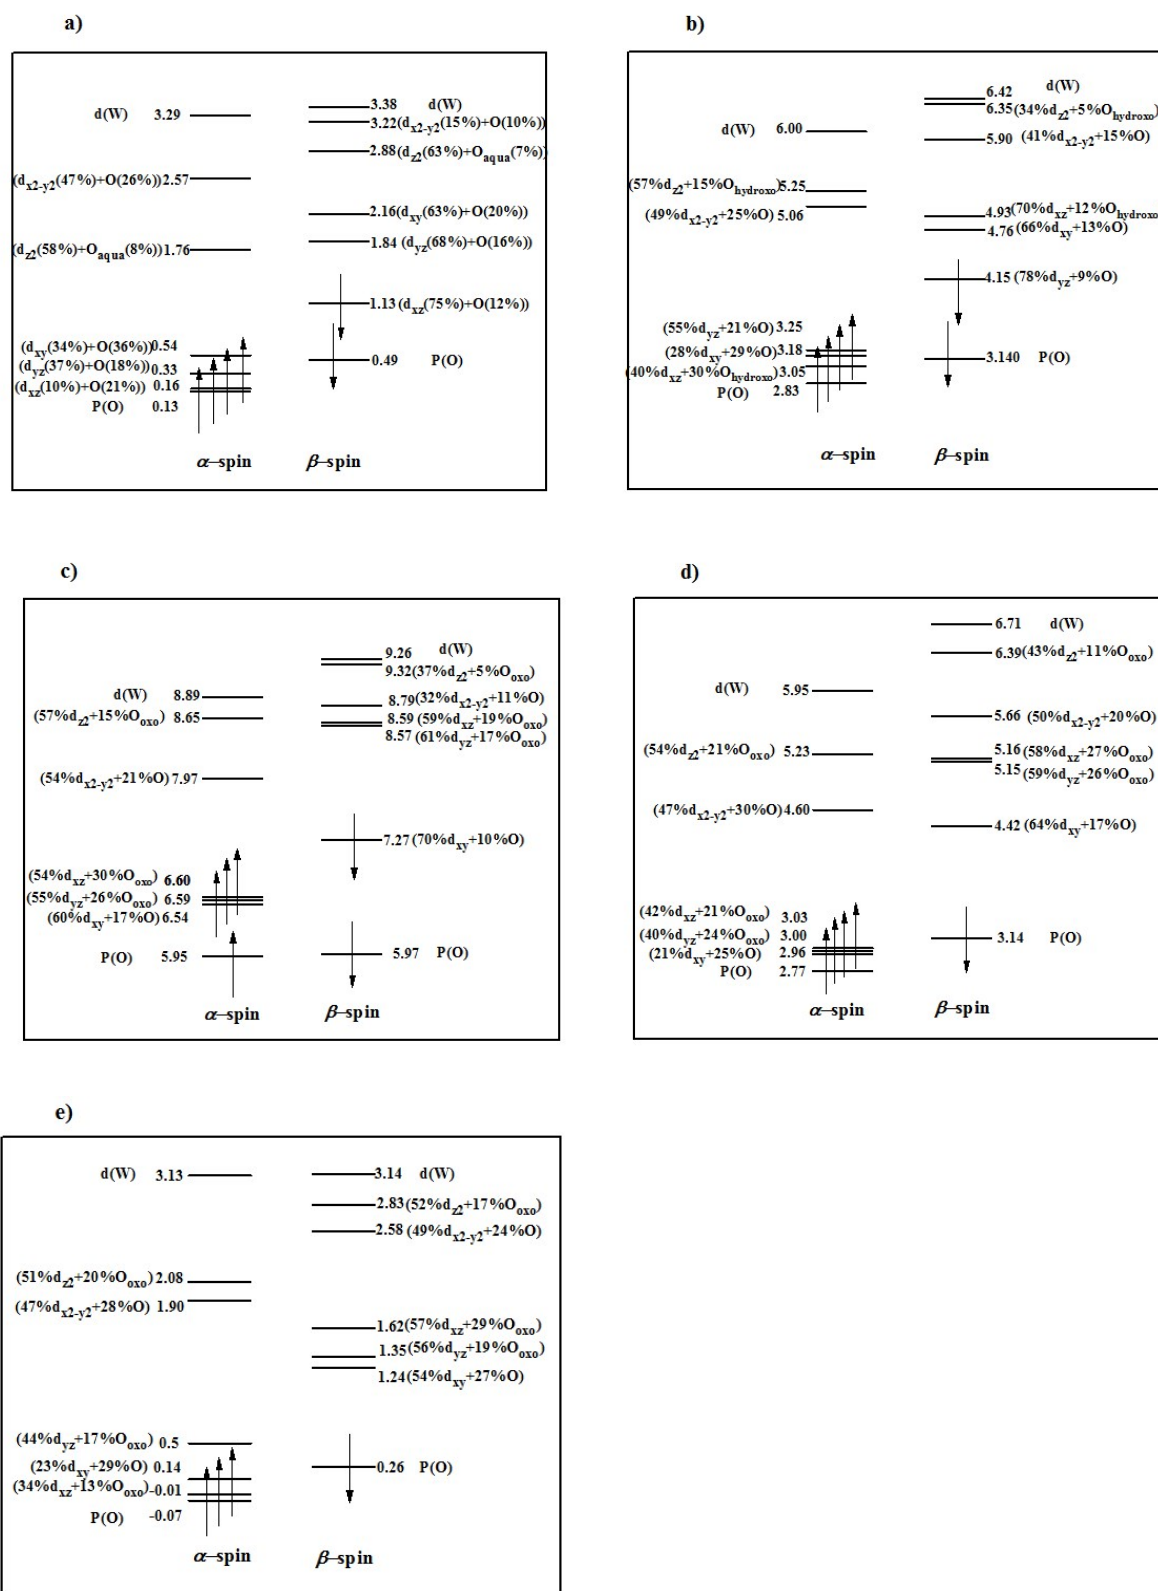

**Figure S2.** The energy level expressions of FMOs for a)  $\text{Fe}^{\text{IV}}\text{OH}_2$ , b)  $\text{Fe}^{\text{IV}}\text{OH}$ , c)  $\text{Fe}^{\text{IV}}\text{O}$ , d)  $\text{Fe}^{\text{VO}}$ , and e)  $\text{Fe}^{\text{VI}}\text{O}$  POMs in the ground state calculated at UOPBE/6-31G(d) level (LANL2DZ basis set on the metal atom).

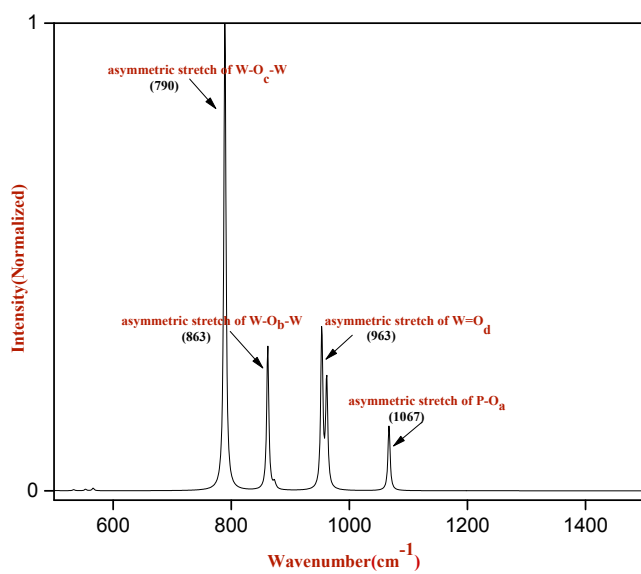

**Figure S3:** Simulated IR (cm<sup>-1</sup>) of [PW<sub>12</sub>O<sub>40</sub>]<sup>-3</sup> with spin state=1.

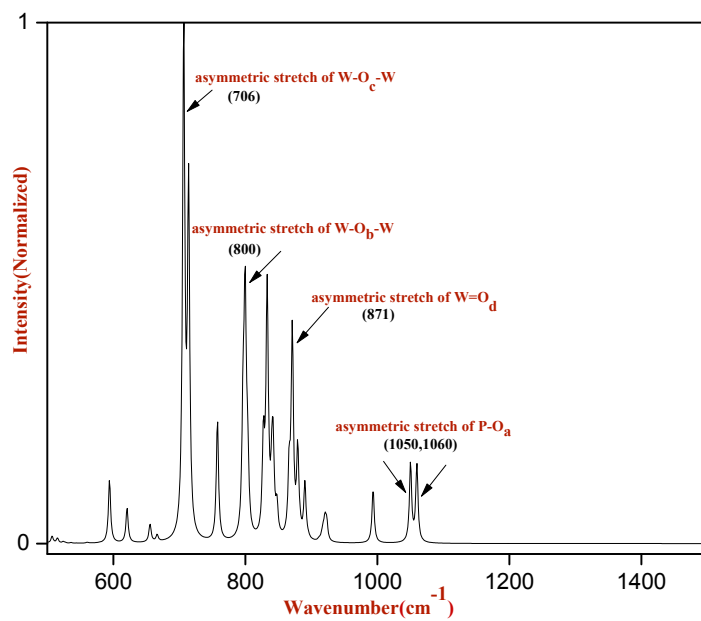

**Figure S4:** Simulated IR (cm<sup>-1</sup>) of [PW<sub>11</sub>O<sub>39</sub>]<sup>-7</sup> with spin state=1.

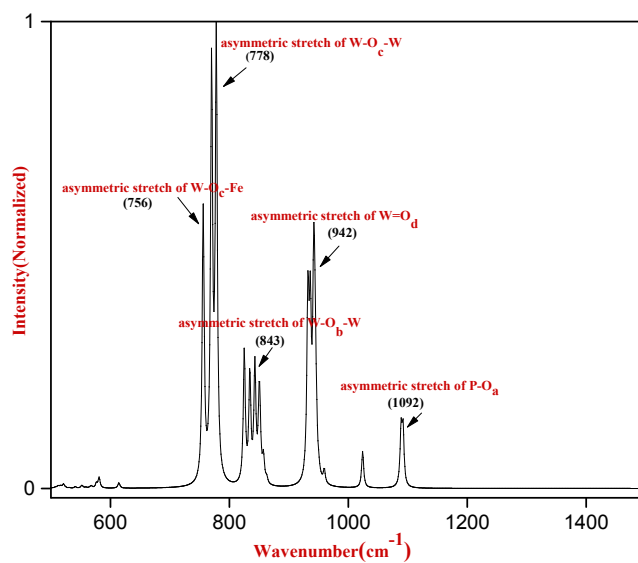

**Figure S5:** Simulated IR ( $\text{cm}^{-1}$ ) of  $[\text{PW}_{11}\text{O}_{39}\text{Fe}^{+3}]^{-4}$  with spin state=2.

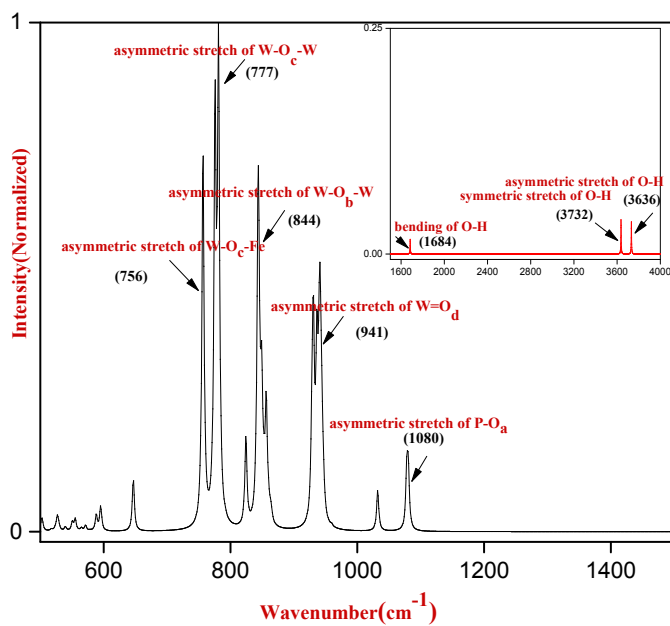

**Figure S6:** Simulated IR ( $\text{cm}^{-1}$ ) of  $[\text{PW}_{11}\text{O}_{39}(\text{Fe}^{+3}\text{OH}_2)]^{-4}$  with spin state=2.



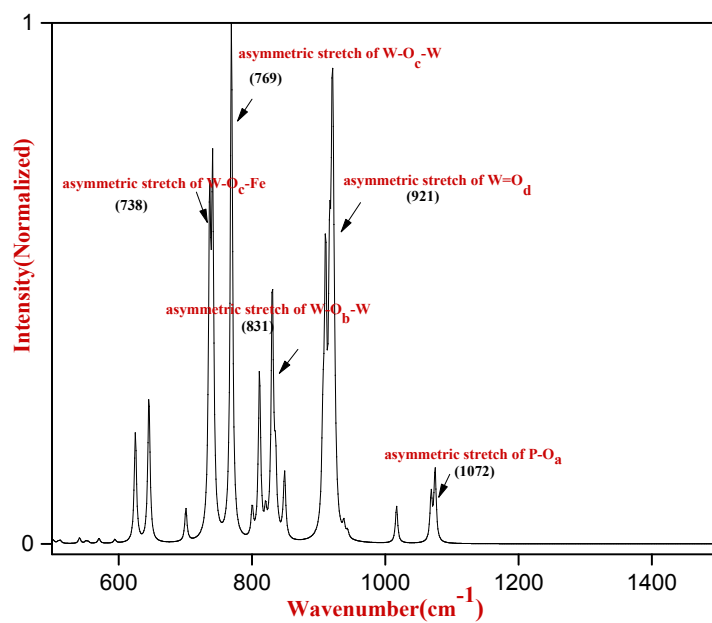

**Figure S7:** Simulated IR ( $cm^{-1}$ ) of  $[PW_{11}O_{39}Fe^{+2}]^{-5}$  with spin state=1.

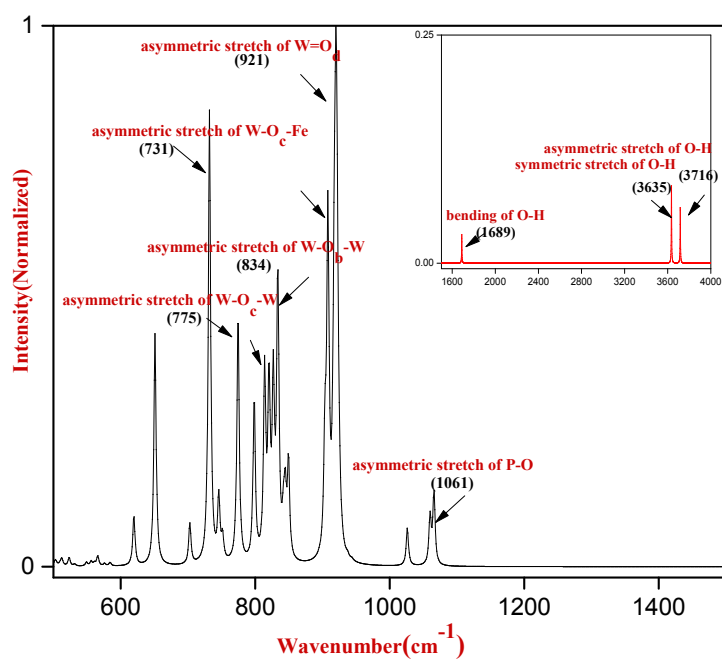

**Figure S8:** Simulated IR ( $cm^{-1}$ ) of  $[PW_{11}O_{39}(Fe^{+2}OH_2)]^{-5}$  with spin state=1.

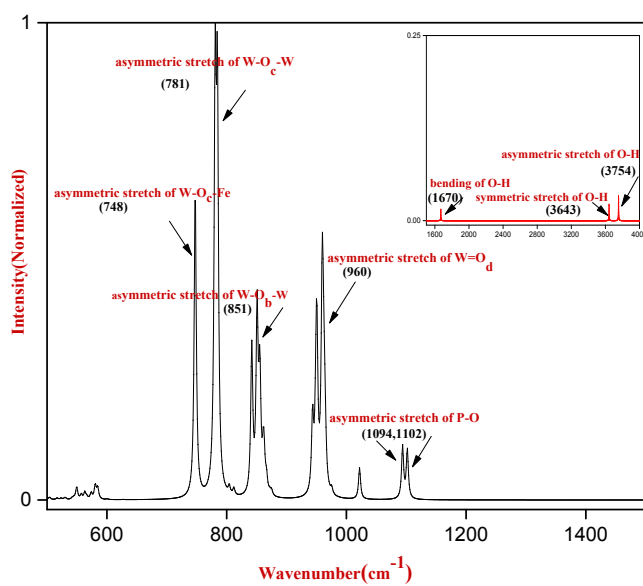

**Figure S9:** Simulated IR ( $\text{cm}^{-1}$ ) of  $[\text{PW}_{11}\text{O}_{39}(\text{Fe}^{\text{IV}}\text{OH}_2)]^{3-}$  with spin state=3.

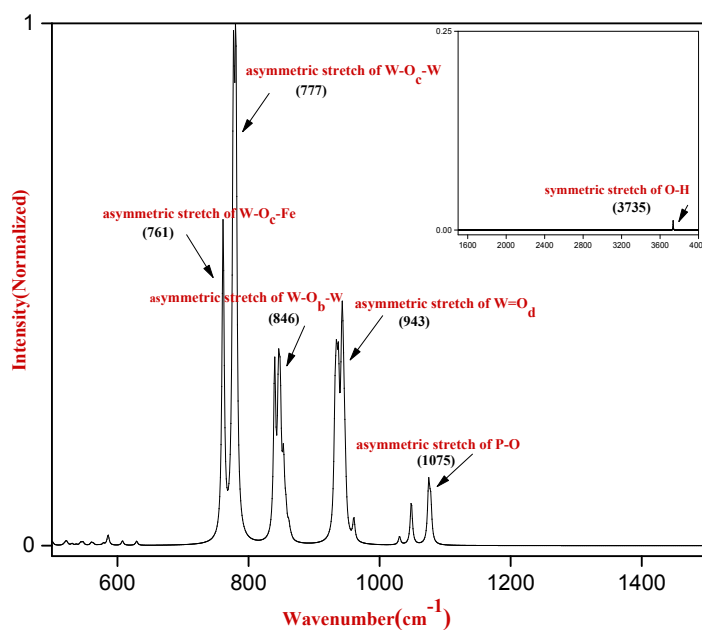

**Figure S10:** Simulated IR ( $\text{cm}^{-1}$ ) of  $[\text{PW}_{11}\text{O}_{39}(\text{Fe}^{\text{IV}}\text{OH})]^{4-}$  with spin state=3.

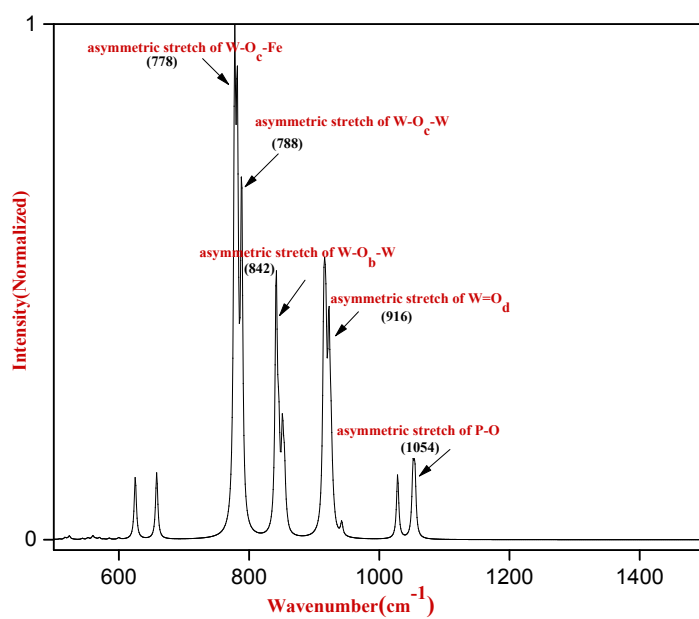

**Figure S11:** Simulated IR ( $cm^{-1}$ ) of  $[PW_{11}O_{39}(Fe^{IV}O)]^{5-}$  with spin state=3.

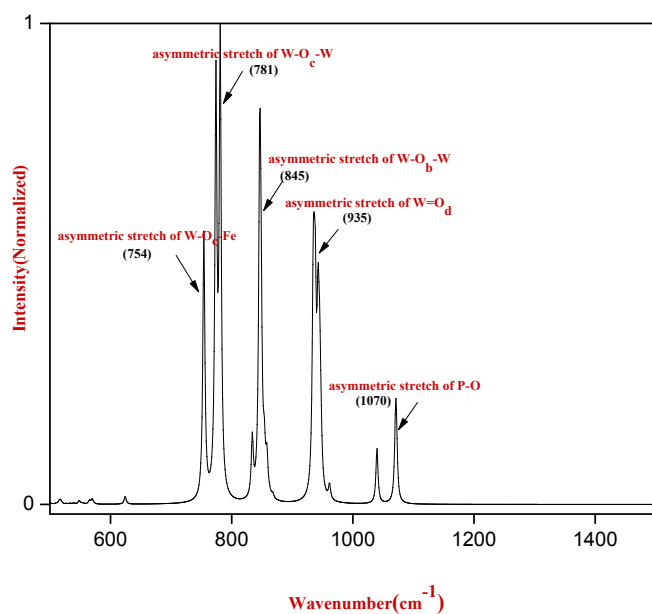

**Figure S12:** Simulated IR ( $cm^{-1}$ ) of  $[PW_{11}O_{39}(Fe^{VO})]^{4+}$  with spin state=4.

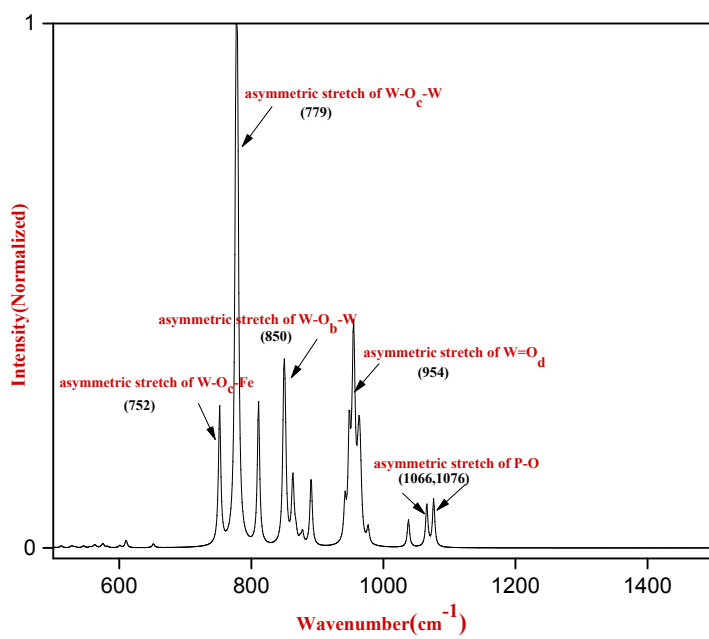

**Figure S13:** Simulated IR (cm<sup>-1</sup>) of [PW<sub>11</sub>O<sub>39</sub>(Fe<sup>VI</sup>O)]<sup>3-</sup> with spin state=3.
